# Supplementary material for: Disabled-2 is a negative immune regulator of lipopolysaccharide-stimulated Toll-like receptor 4 internalization and signaling
Source: PubMed Central journal article supplement (PMC5066213; doi:10.1038/srep35343), 2016-10-17
Supplement: srep35343-s1.pdf [file srep35343-s1.pdf]

**Disabled-2 is a negative immune regulator of lipopolysaccharide-stimulated Toll-like receptor 4 internalization and signaling**

Wei-Shan Hung<sup>1</sup>, Pin Ling<sup>2,3</sup>, Ju-Chien Cheng<sup>4</sup>, Shy-Shin Chang<sup>5</sup>, Ching-Ping Tseng<sup>1,6,7,8</sup>

<sup>1</sup>Graduate Institute of Biomedical Sciences, College of Medicine, Chang Gung University, Kwei-Shan, Taoyuan 333, Taiwan, Republic of China

<sup>2</sup>Institute of Basic Medical Sciences, College of Medicine, National Cheng Kung University, Tainan 701, Taiwan, Republic of China

<sup>3</sup>Department of Microbiology and Immunology, College of Medicine, National Cheng Kung University, Tainan 701, Taiwan, Republic of China

<sup>4</sup>Department of Medical Laboratory Science and Biotechnology, China Medical University, Taichung 404, Taiwan, Republic of China

<sup>5</sup>Department of Family Medicine, Chang Gung Memorial Hospital, Kweishan, Taoyuan 333, Taiwan, Republic of China

<sup>6</sup>Department of Medical Biotechnology and Laboratory Science, College of Medicine, Chang Gung University, Kwei-Shan, Taoyuan 333, Taiwan, Republic of China

<sup>7</sup>Molecular Medicine Research Center, Chang Gung University, Kwei-Shan, Taoyuan 333, Taiwan, Republic of China

<sup>8</sup>Department of Laboratory Medicine, Chang Gung Memorial Hospital, Kwei-Shan, Taoyuan 333, Taiwan, Republic of China

**To whom all correspondence should be addressed:**

Ching-Ping Tseng, Department of Medical Biotechnology and Laboratory Science, College of Medicine, Chang Gung University, Kwei-Shan, Taoyuan 333, Taiwan, Republic of China. Tel.: +886-3-2118800 ext. 5202; Fax: +886-3-2118355; e-mail: [ctseng@mail.cgu.edu.tw](mailto:ctseng@mail.cgu.edu.tw).

## Supplementary Figure and Tables

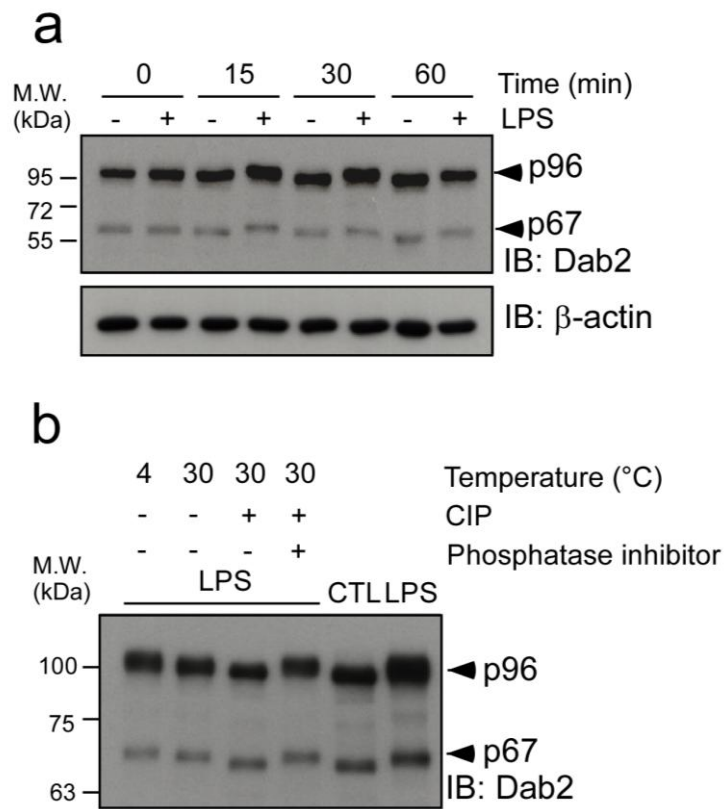

### Supplementary Fig. S1 Dab2 was phosphorylated upon LPS stimulation.

(a) The shLuc cells were treated with LPS (100 ng/ml) for the indicated time. The cell lysates were collected for Western blotting using the antibody against Dab2. The expression of  $\beta$ -actin was used as a control for equal protein loading. (b) Reversal of gel mobility shift by phosphatase treatment. Protein extracts from shLuc cells treated with LPS for 30 min were kept at 4 $^{\circ}$ C or 30 $^{\circ}$ C in the presence of calf intestinal phosphatase (CIP) with or without the addition of the phosphatase inhibitors.

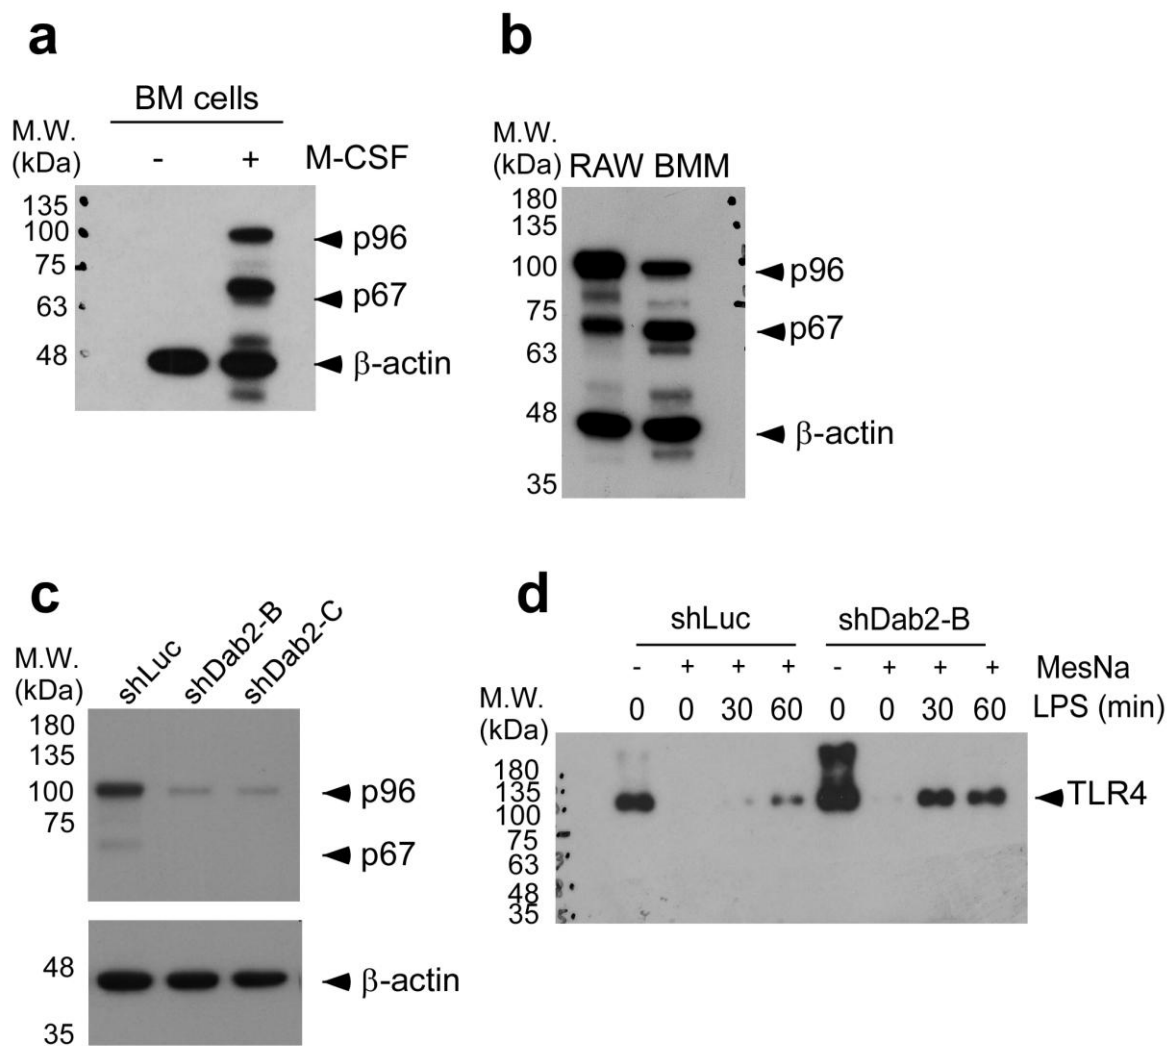

**Supplementary Fig. S2 Full Western blots of Fig. 1b, Fig. 1c, Fig. 2a and Fig. 3d.**

Fig. S2a: full Western blot of Fig. 1b.

Fig. S2b: full Western blot of Fig. 1c.

Fig. S2c: full Western blot of Fig. 2a.

Fig. S2d: full Western blot of Fig. 3d.

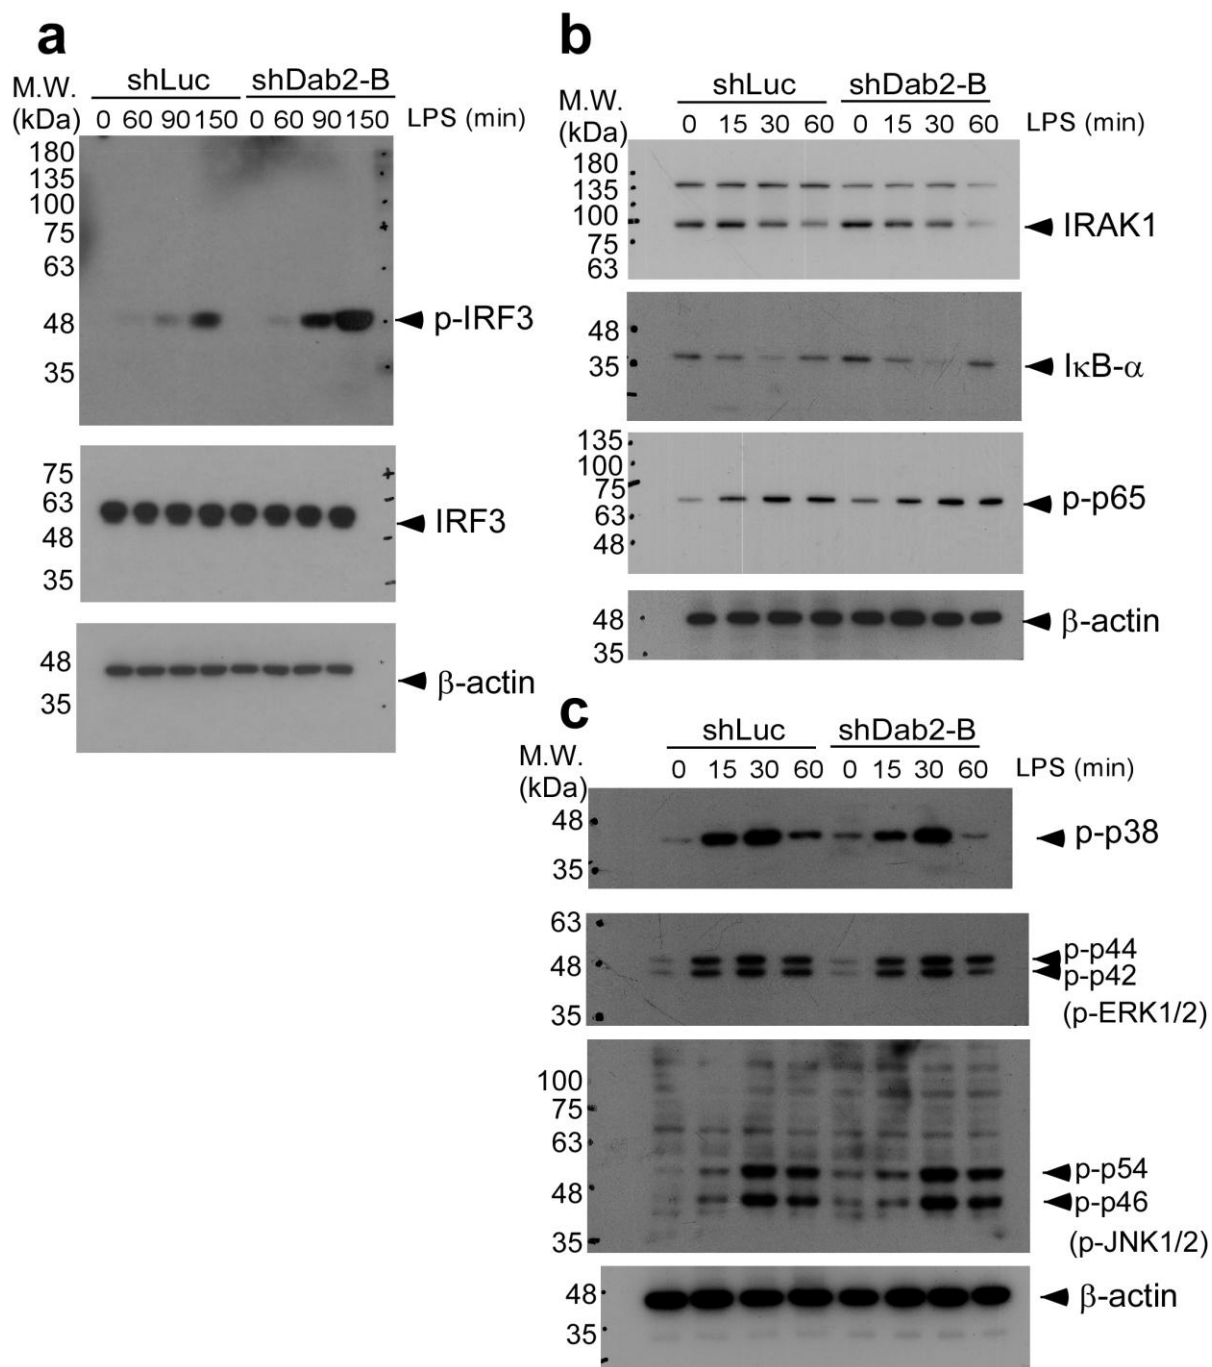

**Supplementary Fig. S3 Full Western blots of Fig. 4a-c.**

Fig. S3a: full Western blot of Fig. 4a .

Fig. S3b: full Western blot of Fig. 4b.

Fig. S3c: full Western blot of Fig. 4c.

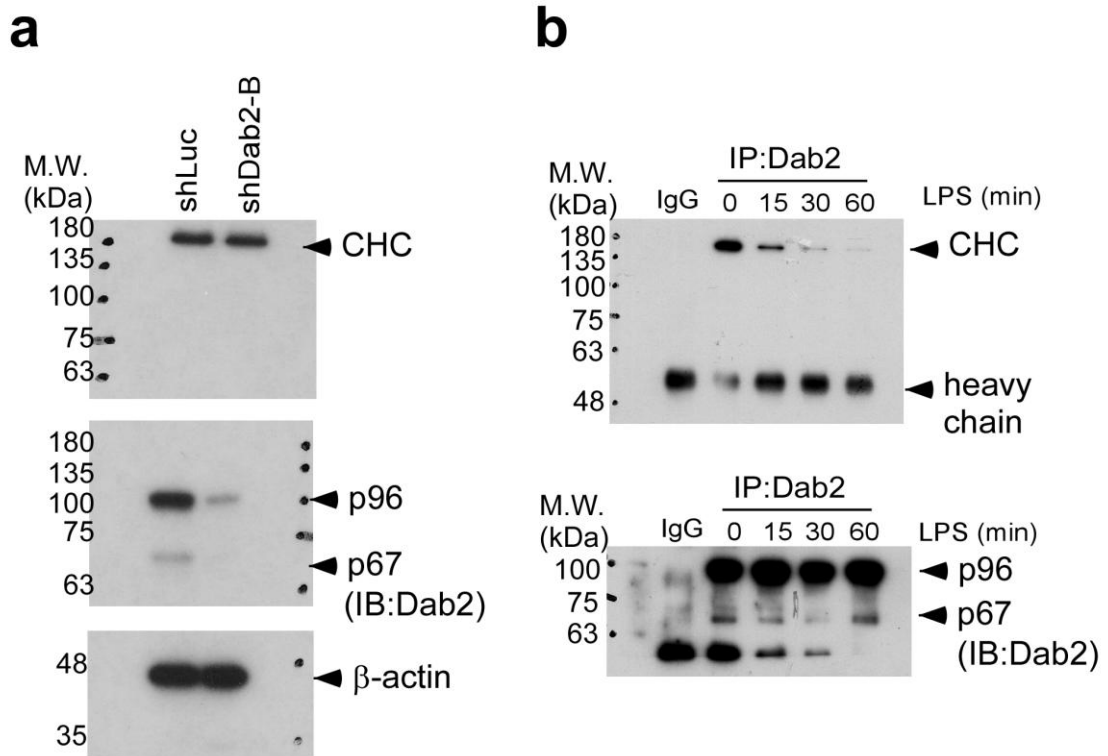

**Supplementary Fig. S4 Full Western blots of Fig. 5b and Fig.5c**

Fig. S4a: full Western blot of Fig. 5b.

Fig. S4b: full Western blot of Fig. 5c.

**Table S1.-List of primer sets used in quantitative RT-PCR**

| <b>No.</b> | <b>Gene</b>                     | <b>Primer sequences</b>                                                                   |
|------------|---------------------------------|-------------------------------------------------------------------------------------------|
| <b>1</b>   | <b>mTNF-<math>\alpha</math></b> | Fw: 5'-CTA TGG CCC AGA CCC TCA CAC TC -3'<br>Rv:5'-GCT GGC ACC ACT AGT TGG TTG TCT T 3'   |
| <b>2</b>   | <b>mIL-6</b>                    | Fw: 5'- CGT GGA AAT GAG AAA AGA GTT GTG-3'<br>Rv:5'-CCA GTT TGG TAG CAT CCA TCA TTT CT 3' |
| <b>3</b>   | <b>mIFN-<math>\beta</math></b>  | Fw: 5'-GGC GGT TCC TTC GAG TGA CA-3'<br>Rv:5'-GATGG CAAAG GCAGT GTAAC TCTT3'              |
| <b>4</b>   | <b>mRANTES</b>                  | Fw: 5'-TGC CCT CAC CAT CAT CCT CAC T-3'<br>Rv:5'- GGC GGT TCC TTC GAG TGA CA-3'           |

**Table S2. The differentially expressed genes between LPS-treated and untreated shLuc cells (LL/LC)**

| No.                       | GenBank accession no. | Gene Symbol          | Log <sub>2</sub> Ratio | Fold Change |
|---------------------------|-----------------------|----------------------|------------------------|-------------|
| <b>Up-regulated genes</b> |                       |                      |                        |             |
| 1                         | NM_009971.1           | <i>Csf3</i>          | 6.64                   | 100.00      |
| 2                         | NM_008361.3           | <i>Il1b</i>          | 6.64                   | 100.00      |
| 3                         | NM_009140.2           | <i>Cxcl2</i>         | 6.64                   | 100.00      |
| 4                         | NM_025404.3           | <i>Arl4d</i>         | 6.64                   | 99.72       |
| 5                         | NM_008392.1           | <i>Irg1</i>          | 6.63                   | 98.85       |
| 6                         | NM_007707.3           | <i>Socs3</i>         | 5.52                   | 45.79       |
| 7                         | NM_011198.3           | <i>Ptgs2</i>         | 5.44                   | 43.53       |
| 8                         | NM_013599.2           | <i>Mmp9</i>          | 5.32                   | 40.04       |
| 9                         | NM_177371.3           | <i>Tnfsf15</i>       | 4.67                   | 25.48       |
| 10                        | NM_007528.3           | <i>Bcl6b</i>         | 4.56                   | 23.56       |
| 11                        | NM_011333.3           | <i>Ccl2</i>          | 4.20                   | 18.44       |
| 12                        | NM_011610.3           | <i>Tnfrsf1b</i>      | 4.17                   | 17.98       |
| 13                        | NM_001159395.1        | <i>Nfkbiz</i>        | 4.11                   | 17.23       |
| 14                        | NM_001039701.3        | <i>Il1rn</i>         | 4.05                   | 16.56       |
| 15                        | NM_009344.3           | <i>Phlda1</i>        | 4.02                   | 16.23       |
| 16                        | NM_011113.3           | <i>Plaur</i>         | 3.96                   | 15.57       |
| 17                        | NM_007987.2           | <i>Fas</i>           | 3.94                   | 15.32       |
| 18                        | NM_010510.1           | <i>Ifnb1</i>         | 3.74                   | 13.34       |
| 19                        | NM_008871.2           | <i>Serpine1</i>      | 3.73                   | 13.27       |
| 20                        | NM_024406.2           | <i>Fabp4</i>         | 3.71                   | 13.09       |
| 21                        | NM_152804.2           | <i>Plk2</i>          | 3.67                   | 12.73       |
| 22                        | NM_011607.3           | <i>Tnc</i>           | 3.67                   | 12.73       |
| 23                        | NM_008321.2           | <i>Id3</i>           | 3.67                   | 12.70       |
| 24                        | NM_010484.2           | <i>Slc6a4</i>        | 3.66                   | 12.66       |
| 25                        | NM_013693.2           | <i>Tnf</i>           | 3.62                   | 12.30       |
| 26                        | NM_007836.1           | <i>Gadd45a</i>       | 3.48                   | 11.14       |
| 27                        | NM_009779.2           | <i>C3ar1</i>         | 3.41                   | 10.65       |
| 28                        | NM_011267.3           | <i>Rgs16</i>         | 3.40                   | 10.53       |
| 29                        | NM_001045526.2        | <i>A430084P05Rik</i> | 3.38                   | 10.40       |
| 30                        | NM_009344.3           | <i>Phlda1</i>        | 3.37                   | 10.33       |

|    |                |                      |      |       |
|----|----------------|----------------------|------|-------|
| 31 | NM_023044.2    | <i>Slc15a3</i>       | 3.33 | 10.06 |
| 32 | NM_178890.3    | <i>Abtb2</i>         | 3.31 | 9.91  |
| 33 | NM_030720.1    | <i>Gpr84</i>         | 3.30 | 9.83  |
| 34 | NM_001025606.1 | <i>Tmem171</i>       | 3.27 | 9.66  |
| 35 | NM_023061.2    | <i>Mcam</i>          | 3.24 | 9.47  |
| 36 | NM_011057.3    | <i>Pdgfb</i>         | 3.24 | 9.43  |
| 37 | NM_030701.3    | <i>Niacr1</i>        | 3.23 | 9.41  |
| 38 | NM_019777.3    | <i>Ikbke</i>         | 3.22 | 9.33  |
| 39 | NM_009704.3    | <i>Areg</i>          | 3.21 | 9.28  |
| 40 | NM_001044384.1 | <i>Timp1</i>         | 3.17 | 8.99  |
| 41 | NM_019948.2    | <i>Clec4e</i>        | 3.14 | 8.84  |
| 42 | NM_145636.1    | <i>Il27</i>          | 3.13 | 8.76  |
| 43 | NM_025541.3    | <i>Asf1a</i>         | 3.13 | 8.75  |
| 44 | NM_133662.2    | <i>Ier3</i>          | 3.12 | 8.69  |
| 45 | NM_030701.3    | <i>Niacr1</i>        | 3.12 | 8.67  |
| 46 | NM_008230.5    | <i>Hdc</i>           | 3.08 | 8.46  |
| 47 | NM_009421.3    | <i>Traf1</i>         | 3.04 | 8.21  |
| 48 | NM_001177982.1 | <i>Pde4b</i>         | 3.01 | 8.07  |
| 49 | NM_026772.2    | <i>Cdc42ep2</i>      | 2.97 | 7.84  |
| 50 | NM_010235.2    | <i>Fosl1</i>         | 2.93 | 7.61  |
| 51 | NM_029478.3    | <i>Vmpl</i>          | 2.92 | 7.58  |
| 52 | NM_008655.1    | <i>Gadd45b</i>       | 2.92 | 7.57  |
| 53 | NM_009506.2    | <i>Vegfc</i>         | 2.91 | 7.50  |
| 54 | NM_008842.3    | <i>Pim1</i>          | 2.86 | 7.25  |
| 55 | NM_008655.1    | <i>Gadd45b</i>       | 2.85 | 7.23  |
| 56 | XR_140864.1    | <i>5330417H12Rik</i> | 2.83 | 7.13  |
| 57 | NM_010807.4    | <i>Marcksl1</i>      | 2.82 | 7.08  |
| 58 | NM_009397.3    | <i>Tnfaip3</i>       | 2.78 | 6.86  |
| 59 | NM_172989.1    | <i>Lpar1</i>         | 2.77 | 6.83  |
| 60 | NM_011361.3    | <i>Sgk1</i>          | 2.74 | 6.66  |
| 61 | NM_001077189.1 | <i>Fcgr2b</i>        | 2.73 | 6.64  |
| 62 | NM_026644.2    | <i>Agpat4</i>        | 2.71 | 6.56  |
| 63 | NM_009396.2    | <i>Tnfaip2</i>       | 2.70 | 6.49  |
| 64 | NM_010187.2    | <i>Fcgr2b</i>        | 2.70 | 6.48  |
| 65 | NM_021274.2    | <i>Cxcl10</i>        | 2.69 | 6.44  |
| 66 | NM_153159.2    | <i>Zc3h12a</i>       | 2.68 | 6.39  |



|     |                |                |      |      |
|-----|----------------|----------------|------|------|
| 67  | NM_009895.3    | <i>Cish</i>    | 2.66 | 6.34 |
| 68  | NM_025286.2    | <i>Slc31a2</i> | 2.63 | 6.19 |
| 69  | NM_199241.2    | <i>Sema6d</i>  | 2.63 | 6.19 |
| 70  | NM_001146161.1 | <i>Slc11a2</i> | 2.63 | 6.17 |
| 71  | NM_013807.2    | <i>Plk3</i>    | 2.62 | 6.17 |
| 72  | NM_207231.1    | <i>Arl5c</i>   | 2.62 | 6.13 |
| 73  | NM_007484.2    | <i>Rhoc</i>    | 2.62 | 6.13 |
| 74  | NM_001013365.2 | <i>Osm</i>     | 2.61 | 6.11 |
| 75  | NM_001048054.1 | <i>Dusp16</i>  | 2.61 | 6.09 |
| 76  | NM_008348.2    | <i>Il10ra</i>  | 2.58 | 5.98 |
| 77  | NM_029537.1    | <i>Tmem98</i>  | 2.56 | 5.91 |
| 78  | NM_174850.3    | <i>Micall2</i> | 2.56 | 5.88 |
| 79  | NM_011110.4    | <i>Pla2g5</i>  | 2.54 | 5.80 |
| 80  | NM_009044.2    | <i>Rel</i>     | 2.50 | 5.65 |
| 81  | NM_026097.3    | <i>Rffl</i>    | 2.48 | 5.57 |
| 82  | NM_001005846.2 | <i>Mcoln2</i>  | 2.48 | 5.56 |
| 83  | NM_013867.2    | <i>Bcar3</i>   | 2.47 | 5.53 |
| 84  | NM_011338.2    | <i>Ccl9</i>    | 2.46 | 5.50 |
| 85  | NR_029806.1    | <i>Mir221</i>  | 2.45 | 5.46 |
| 86  | NM_176913.3    | <i>Dpep2</i>   | 2.44 | 5.43 |
| 87  | NM_021394.2    | <i>Zbp1</i>    | 2.44 | 5.42 |
| 88  | NM_008714.3    | <i>Notch1</i>  | 2.44 | 5.42 |
| 89  | NM_001081180.1 | <i>Spink5</i>  | 2.43 | 5.40 |
| 90  | NM_010208.4    | <i>Fgr</i>     | 2.42 | 5.34 |
| 91  | NM_010215.3    | <i>Il4i1</i>   | 2.41 | 5.33 |
| 92  | NM_015790.3    | <i>Icosl</i>   | 2.39 | 5.25 |
| 93  | NM_011426.3    | <i>Siglec1</i> | 2.38 | 5.19 |
| 94  | NM_021384.4    | <i>Rsad2</i>   | 2.35 | 5.11 |
| 95  | NM_134102.4    | <i>Pla1a</i>   | 2.33 | 5.05 |
| 96  | NM_001191008.1 | <i>Sstr5</i>   | 2.32 | 5.01 |
| 97  | NM_019429.2    | <i>Prss16</i>  | 2.32 | 4.98 |
| 98  | NM_001048054.1 | <i>Dusp16</i>  | 2.31 | 4.97 |
| 99  | NM_010755.3    | <i>Maff</i>    | 2.31 | 4.96 |
| 100 | NM_145828.3    | <i>Xylt2</i>   | 2.29 | 4.88 |
| 101 | NM_133753.1    | <i>Errfi1</i>  | 2.28 | 4.87 |

|     |                |                      |      |      |
|-----|----------------|----------------------|------|------|
| 102 | NM_001167680.1 | <i>Rhbdf2</i>        | 2.28 | 4.86 |
| 103 | NM_001039385.1 | <i>Vgf</i>           | 2.27 | 4.83 |
| 104 | NM_011756.4    | <i>Zfp36</i>         | 2.25 | 4.75 |
| 105 | NM_009743.4    | <i>Bcl2l1</i>        | 2.25 | 4.75 |
| 106 | NM_013612.2    | <i>Slc11a1</i>       | 2.24 | 4.72 |
| 107 | NM_017466.4    | <i>Ccrl2</i>         | 2.23 | 4.71 |
| 108 | NR_015566.2    | <i>A330023F24Rik</i> | 2.23 | 4.68 |
| 109 | NM_028800.3    | <i>Stk40</i>         | 2.22 | 4.66 |
| 110 | NM_010090.2    | <i>Dusp2</i>         | 2.22 | 4.65 |
| 111 | NM_172833.2    | <i>Malt1</i>         | 2.22 | 4.65 |
| 112 | NM_177390.3    | <i>Myo1d</i>         | 2.21 | 4.63 |
| 113 | NM_009132.2    | <i>Scin</i>          | 2.19 | 4.58 |
| 114 | NM_025684.2    | <i>Nepn</i>          | 2.19 | 4.57 |
| 115 | NM_001163556.1 | <i>Pou2f2</i>        | 2.19 | 4.56 |
| 116 | NM_011577.1    | <i>Tgfb1</i>         | 2.18 | 4.54 |
| 117 | NM_010119.5    | <i>Ehd1</i>          | 2.15 | 4.43 |
| 118 | NM_007754.2    | <i>Cpd</i>           | 2.14 | 4.42 |
| 119 | NM_008416.3    | <i>Junb</i>          | 2.13 | 4.39 |
| 120 | NM_010577.3    | <i>Itga5</i>         | 2.13 | 4.37 |
| 121 | NM_019549.2    | <i>Plek</i>          | 2.13 | 4.36 |
| 122 | NM_011414.3    | <i>Slpi</i>          | 2.11 | 4.32 |
| 123 | NM_025638.2    | <i>Gdpd1</i>         | 2.09 | 4.27 |
| 124 | NM_026985.1    | <i>1810033B17Rik</i> | 2.07 | 4.20 |
| 125 | NM_027455.2    | <i>Qpct</i>          | 2.05 | 4.15 |
| 126 | NM_010495.2    | <i>Id1</i>           | 2.05 | 4.14 |
| 127 | NM_001199305.1 | <i>Atxn1</i>         | 2.04 | 4.11 |
| 128 | NM_001033270.2 | <i>Slc4a7</i>        | 2.04 | 4.10 |
| 129 | NM_013652.2    | <i>Ccl4</i>          | 2.03 | 4.09 |
| 130 | NM_009612.2    | <i>Acvrl1</i>        | 2.03 | 4.09 |
| 131 | NM_018807.5    | <i>Plagl2</i>        | 2.03 | 4.07 |
| 132 | NM_011400.3    | <i>Slc2a1</i>        | 2.02 | 4.06 |
| 133 | NM_010403.2    | <i>Hao1</i>          | 2.00 | 4.00 |
| 134 | NM_001126047.1 | <i>Sema4c</i>        | 2.00 | 3.99 |
| 135 | NM_007413.4    | <i>Adora2b</i>       | 1.99 | 3.97 |
| 136 | NM_001099624.2 | <i>Rapgef2</i>       | 1.99 | 3.96 |

|     |                |                      |      |      |
|-----|----------------|----------------------|------|------|
| 137 | NM_018764.2    | <i>Pcdh7</i>         | 1.98 | 3.93 |
| 138 | NM_009288.2    | <i>Stk10</i>         | 1.96 | 3.90 |
| 139 | NM_001163591.1 | <i>Stx11</i>         | 1.96 | 3.88 |
| 140 | NM_011408.1    | <i>Slfn2</i>         | 1.94 | 3.84 |
| 141 | NM_175437.3    | <i>Pion</i>          | 1.94 | 3.83 |
| 142 | NM_027871.1    | <i>Arhgef3</i>       | 1.93 | 3.82 |
| 143 | NM_001025395.2 | <i>Src</i>           | 1.93 | 3.80 |
| 144 | NM_001114088.1 | <i>Pdlim7</i>        | 1.92 | 3.78 |
| 145 | NM_008331.3    | <i>Ifit1</i>         | 1.92 | 3.78 |
| 146 | NM_011990.2    | <i>Slc7a11</i>       | 1.90 | 3.74 |
| 147 | NM_011227.1    | <i>Rab20</i>         | 1.90 | 3.72 |
| 148 | NM_013470.2    | <i>Anxa3</i>         | 1.88 | 3.67 |
| 149 | NM_018782.2    | <i>Calcrl</i>        | 1.87 | 3.66 |
| 150 | NM_001163591.1 | <i>Stx11</i>         | 1.87 | 3.66 |
| 151 | NM_175512.2    | <i>Dhrs9</i>         | 1.86 | 3.63 |
| 152 | NM_001040397.4 | <i>Filip11</i>       | 1.86 | 3.63 |
| 153 | NM_001093766.1 | <i>Myadm</i>         | 1.86 | 3.63 |
| 154 | NM_013532.2    | <i>Lilrb4</i>        | 1.85 | 3.61 |
| 155 | NM_023380.2    | <i>Samsn1</i>        | 1.84 | 3.59 |
| 156 | NM_011410.2    | <i>Slfn4</i>         | 1.83 | 3.56 |
| 157 | NM_026929.4    | <i>Chac1</i>         | 1.83 | 3.55 |
| 158 | NM_001243050.1 | <i>Atp6v0a1</i>      | 1.82 | 3.54 |
| 159 | NM_183177.2    | <i>Zfp811</i>        | 1.82 | 3.52 |
| 160 | NM_028127.3    | <i>Frmd6</i>         | 1.81 | 3.51 |
| 161 | NM_026058.4    | <i>Lass4</i>         | 1.80 | 3.49 |
| 162 | NM_144797.3    | <i>Metrn1</i>        | 1.80 | 3.48 |
| 163 | NM_153119.2    | <i>Plekho2</i>       | 1.80 | 3.47 |
| 164 | NM_011777.2    | <i>Zyx</i>           | 1.79 | 3.47 |
| 166 | NM_201518.4    | <i>Flrt2</i>         | 1.79 | 3.46 |
| 167 | NM_027249.2    | <i>Tlcd2</i>         | 1.78 | 3.43 |
| 168 | NM_001042659.1 | <i>Fzd5</i>          | 1.77 | 3.41 |
| 169 | NM_183148.3    | <i>Iffo2</i>         | 1.76 | 3.40 |
| 170 | NM_019472.2    | <i>Myo10</i>         | 1.76 | 3.40 |
| 171 | NM_134133.2    | <i>2010002N04Rik</i> | 1.76 | 3.39 |
| 172 | NM_029422.3    | <i>Tm7sf4</i>        | 1.76 | 3.39 |

|     |                |                      |      |      |
|-----|----------------|----------------------|------|------|
| 173 | NM_015789.3    | <i>Dkk11</i>         | 1.76 | 3.38 |
| 174 | NR_003508.1    | <i>Mx2</i>           | 1.75 | 3.37 |
| 175 | NM_019549.2    | <i>Plek</i>          | 1.75 | 3.37 |
| 176 | NM_080853.3    | <i>Slc17a6</i>       | 1.74 | 3.35 |
| 177 | NM_029021.1    | <i>4833422F24Rik</i> | 1.74 | 3.33 |
| 178 | NM_001163565.1 | <i>Ptpn5</i>         | 1.73 | 3.32 |
| 179 | NM_001162921.1 | <i>Zc3h12c</i>       | 1.72 | 3.28 |
| 180 | NM_175645.3    | <i>Xylt1</i>         | 1.71 | 3.28 |
| 181 | NM_001135657.1 | <i>Ptprj</i>         | 1.71 | 3.27 |
| 182 | NM_011521.2    | <i>Sdc4</i>          | 1.70 | 3.25 |
| 183 | NM_011731.3    | <i>Slc6a20b</i>      | 1.69 | 3.24 |
| 184 | NM_008798.2    | <i>Pdcd1</i>         | 1.69 | 3.23 |
| 185 | XM_003084664.1 | <i>Sh2d6</i>         | 1.69 | 3.22 |
| 186 | NM_028696.3    | <i>Obfc2a</i>        | 1.68 | 3.20 |
| 187 | NM_176933.4    | <i>Dusp4</i>         | 1.68 | 3.20 |
| 188 | NM_008327.2    | <i>Ifi202b</i>       | 1.66 | 3.17 |
| 189 | NM_029847.4    | <i>Arsk</i>          | 1.66 | 3.16 |
| 190 | XR_141159.1    | <i>5033430I15Rik</i> | 1.65 | 3.15 |
| 191 | NM_053109.3    | <i>Clec2d</i>        | 1.65 | 3.13 |
| 192 | NM_145953.2    | <i>Cth</i>           | 1.64 | 3.13 |
| 193 | NM_001040400.2 | <i>Tet2</i>          | 1.64 | 3.12 |
| 194 | NM_025821.2    | <i>Carhsp1</i>       | 1.63 | 3.10 |
| 195 | NM_008185.3    | <i>Gstt1</i>         | 1.63 | 3.10 |
| 196 | NM_145950.4    | <i>Osgin2</i>        | 1.63 | 3.09 |
| 197 | NM_008102.3    | <i>Gchl</i>          | 1.62 | 3.08 |
| 198 | NM_007656.4    | <i>Cd82</i>          | 1.61 | 3.06 |
| 199 | NM_001199305.1 | <i>Atnx1</i>         | 1.61 | 3.05 |
| 200 | NM_029083.2    | <i>Ddit4</i>         | 1.61 | 3.05 |
| 201 | NM_010696.3    | <i>Lcp2</i>          | 1.61 | 3.05 |
| 202 | NM_001077407.1 | <i>Nrp2</i>          | 1.61 | 3.04 |
| 203 | NM_207652.2    | <i>Tsc22d1</i>       | 1.60 | 3.04 |
| 204 | NM_175155.4    | <i>Sash1</i>         | 1.60 | 3.04 |
| 205 | NM_001205044.1 | <i>Jarid2</i>        | 1.60 | 3.02 |
| 206 | NM_001111060.1 | <i>Cd59a</i>         | 1.59 | 3.01 |
| 207 | NM_010029.2    | <i>Ddx4</i>          | 1.58 | 2.98 |
| 208 | NM_031195.2    | <i>Msr1</i>          | 1.57 | 2.97 |

|                             |                |                      |       |       |
|-----------------------------|----------------|----------------------|-------|-------|
| 209                         | NM_172924.3    | <i>C230081A13Rik</i> | 1.57  | 2.97  |
| 210                         | NM_133833.2    | <i>Dst</i>           | 1.57  | 2.97  |
| 211                         | NM_008416.3    | <i>Junb</i>          | 1.57  | 2.96  |
| 212                         | NM_023516.5    | <i>Hilpda</i>        | 1.56  | 2.96  |
| 213                         | NM_008518.2    | <i>Ltb</i>           | 1.56  | 2.95  |
| 214                         | NM_001093766.1 | <i>Myadm</i>         | 1.56  | 2.95  |
| 215                         | NM_001164220.1 | <i>Trim13</i>        | 1.55  | 2.93  |
| 216                         | NM_021493.2    | <i>Arhgap23</i>      | 1.55  | 2.93  |
| 217                         | NM_175093.2    | <i>Trib3</i>         | 1.55  | 2.93  |
| 218                         | NM_080844.4    | <i>Serpinc1</i>      | 1.55  | 2.93  |
| 219                         | NM_023516.5    | <i>Hilpda</i>        | 1.54  | 2.91  |
| 220                         | NM_001142959.1 | <i>Bcl2l15</i>       | 1.54  | 2.91  |
| 221                         | NM_001205053.1 | <i>Jdp2</i>          | 1.54  | 2.90  |
| 222                         | NM_028807.3    | <i>1200009I06Rik</i> | 1.53  | 2.90  |
| 223                         | NM_172442.3    | <i>Dtx4</i>          | 1.53  | 2.88  |
| 224                         | NM_181734.3    | <i>Ttpal</i>         | 1.53  | 2.88  |
| 225                         | NM_015747.2    | <i>Slc20a1</i>       | 1.52  | 2.87  |
| 226                         | NM_001190449.1 | <i>Ddah2</i>         | 1.52  | 2.87  |
| 227                         | NM_172145.3    | <i>Fam176b</i>       | 1.51  | 2.85  |
| 228                         | NM_025821.2    | <i>Carhsp1</i>       | 1.51  | 2.85  |
| 229                         | NM_015783.3    | <i>Isg15</i>         | 1.51  | 2.85  |
| 230                         | NM_029219.1    | <i>Rnf19b</i>        | 1.51  | 2.85  |
| 231                         | NM_001113553.1 | <i>Irak2</i>         | 1.50  | 2.83  |
| 232                         | NM_008795.2    | <i>Cdk18</i>         | 1.49  | 2.82  |
| 233                         | NM_015766.2    | <i>Ebi3</i>          | 1.49  | 2.81  |
| 234                         | NM_145456.2    | <i>Zswim6</i>        | 1.49  | 2.80  |
| 235                         | NM_175092.3    | <i>Rhof</i>          | 1.49  | 2.80  |
| 236                         | NM_201361.2    | <i>Fam82a1</i>       | 1.48  | 2.79  |
| 237                         | NR_027888.1    | <i>Sqrdl</i>         | 1.46  | 2.76  |
| 238                         | NM_145456.2    | <i>Zswim6</i>        | 1.45  | 2.73  |
| 239                         | NM_007913.5    | <i>Egr1</i>          | 1.45  | 2.73  |
| <b>Down-regulated genes</b> |                |                      |       |       |
| 1                           | NM_001252506.1 | <i>St6gal1</i>       | -4.08 | 16.94 |
| 2                           | NM_024124.3    | <i>Hdac9</i>         | -3.11 | 8.63  |
| 3                           | NM_145611.4    | <i>Kank2</i>         | -2.86 | 7.24  |
| 4                           | NM_198024.1    | <i>Ranbp3l</i>       | -2.82 | 7.08  |

|    |                |                      |       |      |
|----|----------------|----------------------|-------|------|
| 5  | NM_177000.3    | <i>C130050O18Rik</i> | -2.73 | 6.61 |
| 6  | NM_001081079.1 | <i>Ogfrl1</i>        | -2.65 | 6.28 |
| 7  | NM_007426.3    | <i>Angpt2</i>        | -2.61 | 6.10 |
| 8  | NM_001004156.2 | <i>Plekhg5</i>       | -2.55 | 5.87 |
| 9  | NM_001081656.2 | <i>Neurl1b</i>       | -2.53 | 5.77 |
| 10 | NM_198024.1    | <i>Ranbp3l</i>       | -2.49 | 5.61 |
| 11 | NM_025768.2    | <i>Grtp1</i>         | -2.49 | 5.60 |
| 12 | NM_020581.2    | <i>Angptl4</i>       | -2.47 | 5.52 |
| 13 | NM_008278.2    | <i>Hpgd</i>          | -2.38 | 5.20 |
| 14 | NM_008278.2    | <i>Hpgd</i>          | -2.37 | 5.17 |
| 15 | NM_013495.2    | <i>Cpt1a</i>         | -2.37 | 5.16 |
| 16 | NM_009025.2    | <i>Rasa3</i>         | -2.36 | 5.15 |
| 17 | NM_001163687.1 | <i>Naaa</i>          | -2.31 | 4.96 |
| 18 | NM_029116.2    | <i>Kbtbd11</i>       | -2.29 | 4.87 |
| 19 | NM_001114312.1 | <i>4930506M07Rik</i> | -2.27 | 4.81 |
| 20 | NM_028340.1    | <i>Susd3</i>         | -2.25 | 4.77 |
| 21 | NM_053261.2    | <i>Impa2</i>         | -2.22 | 4.66 |
| 22 | NM_001170643.1 | <i>Rnf144b</i>       | -2.20 | 4.58 |
| 23 | NM_028639.3    | <i>Ttc7</i>          | -2.19 | 4.55 |
| 24 | NM_009846.2    | <i>Cd24a</i>         | -2.11 | 4.31 |
| 25 | NM_027763.1    | <i>Trem1</i>         | -2.10 | 4.28 |
| 26 | NM_134189.2    | <i>Galnt10</i>       | -2.05 | 4.14 |
| 27 | NM_028039.2    | <i>Esco2</i>         | -2.05 | 4.14 |
| 28 | NM_001195006.1 | <i>Ndrp4</i>         | -2.04 | 4.11 |
| 29 | NM_001130186.1 | <i>Phf17</i>         | -2.02 | 4.05 |
| 30 | NM_001080158.1 | <i>Cenpm</i>         | -2.01 | 4.02 |
| 31 | NM_178667.4    | <i>Tfdp2</i>         | -2.01 | 4.02 |
| 32 | NM_001085492.1 | <i>Rere</i>          | -2.01 | 4.02 |
| 33 | NM_030198.3    | <i>Gins3</i>         | -1.99 | 3.96 |
| 34 | NM_001081098.1 | <i>Zfp362</i>        | -1.97 | 3.92 |
| 35 | XR_106143.1    | <i>G430095P16Rik</i> | -1.96 | 3.89 |
| 36 | NM_009154.2    | <i>Sema5a</i>        | -1.95 | 3.85 |
| 37 | XM_003689164.1 | <i>LOC100504500</i>  | -1.95 | 3.85 |
| 38 | NM_172838.3    | <i>Slc16a12</i>      | -1.93 | 3.81 |
| 39 | NM_198305.2    | <i>Klhl17</i>        | -1.93 | 3.80 |
| 40 | NM_145509.2    | <i>5430435G22Rik</i> | -1.92 | 3.77 |

|    |                |                      |       |      |
|----|----------------|----------------------|-------|------|
| 41 | NM_001177867.1 | <i>Sgol2</i>         | -1.91 | 3.76 |
| 42 | NM_020567.2    | <i>Gmnn</i>          | -1.91 | 3.75 |
| 43 | NM_133746.5    | <i>Calhm2</i>        | -1.90 | 3.73 |
| 44 | NM_024264.4    | <i>Cyp27a1</i>       | -1.90 | 3.73 |
| 45 | NM_178699.4    | <i>B930041F14Rik</i> | -1.89 | 3.70 |
| 46 | NM_173047.3    | <i>Cbr3</i>          | -1.88 | 3.68 |
| 47 | NM_009001.6    | <i>Rab3a</i>         | -1.88 | 3.67 |
| 48 | NM_001159538.1 | <i>Fgd2</i>          | -1.88 | 3.67 |
| 49 | NM_023326.2    | <i>Bmyc</i>          | -1.87 | 3.66 |
| 50 | NM_178283.3    | <i>Asb13</i>         | -1.81 | 3.52 |
| 51 | NM_198861.1    | <i>BC046404</i>      | -1.81 | 3.51 |
| 52 | NM_001013368.5 | <i>E2f8</i>          | -1.80 | 3.49 |
| 53 | NM_009387.2    | <i>Tkl1</i>          | -1.80 | 3.48 |
| 54 | NM_001143777.1 | <i>Fam13c</i>        | -1.78 | 3.45 |
| 55 | NM_145462.2    | <i>Haus4</i>         | -1.74 | 3.34 |
| 56 | NM_001146180.1 | <i>Mtss1</i>         | -1.73 | 3.31 |
| 57 | NM_026003.2    | <i>Smarca2</i>       | -1.73 | 3.31 |
| 58 | NM_146040.1    | <i>Cdca7l</i>        | -1.73 | 3.31 |
| 59 | NM_023431.5    | <i>Mum1</i>          | -1.72 | 3.31 |
| 60 | NM_028576.2    | <i>1700106N22Rik</i> | -1.72 | 3.30 |
| 61 | NM_001167592.2 | <i>Gm17365</i>       | -1.72 | 3.30 |
| 62 | NM_172734.3    | <i>Stk38l</i>        | -1.71 | 3.27 |
| 63 | NM_018822.3    | <i>Sgsh</i>          | -1.71 | 3.27 |
| 64 | NM_008618.3    | <i>Mdh1</i>          | -1.70 | 3.25 |
| 65 | NM_172756.2    | <i>Ankle1</i>        | -1.70 | 3.25 |
| 66 | NM_019976.3    | <i>Psrl1</i>         | -1.69 | 3.23 |
| 67 | NM_009593.2    | <i>Abcg1</i>         | -1.69 | 3.22 |
| 68 | NR_040293.1    | <i>2310040G24Rik</i> | -1.67 | 3.18 |
| 69 | NM_011459.4    | <i>Serpinb8</i>      | -1.67 | 3.18 |
| 70 | NM_026038.2    | <i>2810055F11Rik</i> | -1.66 | 3.17 |
| 71 | NM_023850.2    | <i>Chst1</i>         | -1.66 | 3.15 |
| 72 | NM_001168492.1 | <i>Pdcd4</i>         | -1.66 | 3.15 |
| 73 | NM_001163761.1 | <i>6430548M08Rik</i> | -1.65 | 3.13 |
| 74 | NM_011243.1    | <i>Rarb</i>          | -1.64 | 3.12 |
| 75 | NM_001145832.1 | <i>Kifc3</i>         | -1.64 | 3.11 |
| 76 | NM_009183.2    | <i>St8sia4</i>       | -1.64 | 3.11 |

|     |                |                      |       |      |
|-----|----------------|----------------------|-------|------|
| 77  | NM_009079.2    | <i>Rpl22</i>         | -1.63 | 3.10 |
| 78  | NM_010255.3    | <i>Gamt</i>          | -1.63 | 3.10 |
| 79  | NM_146208.2    | <i>Neil3</i>         | -1.63 | 3.10 |
| 80  | NM_017391.3    | <i>Slc5a3</i>        | -1.61 | 3.06 |
| 81  | NM_008628.2    | <i>Msh2</i>          | -1.61 | 3.05 |
| 82  | NM_153571.2    | <i>Hscb</i>          | -1.61 | 3.05 |
| 83  | NM_009806.2    | <i>Cask</i>          | -1.60 | 3.04 |
| 84  | NM_134042.2    | <i>Aldh6a1</i>       | -1.59 | 3.02 |
| 85  | NM_009029.2    | <i>Rb1</i>           | -1.58 | 3.00 |
| 86  | NM_145402.3    | <i>Tmem51</i>        | -1.58 | 2.99 |
| 87  | NM_172560.3    | <i>Cntrob</i>        | -1.57 | 2.98 |
| 88  | NM_197990.3    | <i>I700025G04Rik</i> | -1.57 | 2.98 |
| 89  | NM_026720.2    | <i>Ankrd13d</i>      | -1.57 | 2.97 |
| 90  | NM_008021.4    | <i>Foxm1</i>         | -1.57 | 2.97 |
| 91  | NM_001242424.1 | <i>Fam105a</i>       | -1.57 | 2.97 |
| 92  | NM_027543.3    | <i>Gpr173</i>        | -1.57 | 2.96 |
| 93  | NM_028149.1    | <i>Fbxl20</i>        | -1.57 | 2.96 |
| 94  | NM_013769.2    | <i>Tjp3</i>          | -1.56 | 2.95 |
| 95  | NM_001081241.2 | <i>Fam65a</i>        | -1.55 | 2.94 |
| 96  | NR_027827.1    | <i>A030009H04Rik</i> | -1.55 | 2.93 |
| 97  | NM_027480.3    | <i>Ankrd24</i>       | -1.55 | 2.92 |
| 98  | NM_008317.4    | <i>Hyal1</i>         | -1.54 | 2.91 |
| 99  | NM_001013377.2 | <i>E130306D19Rik</i> | -1.54 | 2.91 |
| 100 | NM_001037134.1 | <i>Ccne2</i>         | -1.54 | 2.91 |
| 101 | NM_023733.3    | <i>Crot</i>          | -1.53 | 2.88 |
| 102 | NM_027715.1    | <i>Otud1</i>         | -1.52 | 2.87 |
| 103 | NM_001163764.1 | <i>Tcf19</i>         | -1.52 | 2.86 |
| 104 | NM_013627.5    | <i>Pax6</i>          | -1.51 | 2.85 |
| 105 | NM_201239.3    | <i>Rnase4</i>        | -1.51 | 2.85 |
| 106 | NM_001164101.1 | <i>Add3</i>          | -1.51 | 2.85 |
| 107 | NM_011391.1    | <i>Slc16a7</i>       | -1.51 | 2.84 |
| 108 | NM_001042653.1 | <i>Oip5</i>          | -1.51 | 2.84 |
| 109 | NM_176837.2    | <i>Arhgap18</i>      | -1.51 | 2.84 |
| 110 | NM_029766.2    | <i>Dtl</i>           | -1.50 | 2.83 |
| 111 | NM_024459.2    | <i>Ppp3r1</i>        | -1.50 | 2.82 |
| 112 | NM_001004164.2 | <i>Gnptab</i>        | -1.50 | 2.82 |



|     |                |                  |       |      |
|-----|----------------|------------------|-------|------|
| 113 | NM_001177544.1 | <i>Hist1h2ao</i> | -1.49 | 2.80 |
| 114 | NM_026662.4    | <i>Prps2</i>     | -1.48 | 2.80 |
| 115 | NM_008845.4    | <i>Pip4k2a</i>   | -1.48 | 2.79 |
| 116 | NM_146073.3    | <i>Zdhhc14</i>   | -1.48 | 2.79 |
| 117 | NM_030087.2    | <i>Ndufv3</i>    | -1.47 | 2.78 |
| 118 | NM_031182.2    | <i>Tfap4</i>     | -1.47 | 2.78 |
| 119 | NM_001163766.1 | <i>Wdr90</i>     | -1.47 | 2.76 |
| 120 | NR_033402.1    | <i>Tyms</i>      | -1.46 | 2.75 |
| 121 | NM_007525.3    | <i>Bard1</i>     | -1.46 | 2.74 |
| 122 | NM_178061.5    | <i>Mob3b</i>     | -1.46 | 2.74 |
| 123 | NM_026321.4    | <i>Fam174a</i>   | -1.45 | 2.74 |
| 124 | NM_139145.4    | <i>Hlcs</i>      | -1.45 | 2.74 |
| 125 | NM_025995.2    | <i>Fbxo5</i>     | -1.45 | 2.74 |
| 126 | NM_026975.2    | <i>Bola1</i>     | -1.45 | 2.74 |
| 127 | NM_177124.4    | <i>Tnrc6b</i>    | -1.45 | 2.74 |

**Table S3. The differentially expressed genes between LPS-treated and untreated shDab2-B cells (DL/DC)**

| No.                       | GenBank accession no. | Gene Symbol          | Log <sub>2</sub> Ratio | Fold Change |
|---------------------------|-----------------------|----------------------|------------------------|-------------|
| <b>Up-regulated genes</b> |                       |                      |                        |             |
| 1                         | NM_009971.1           | <i>Csf3</i>          | 8.53                   | 369.74      |
| 2                         | NM_008361.3           | <i>Il1b</i>          | 7.7                    | 207.62      |
| 3                         | NM_008392.1           | <i>Irg1</i>          | 6.23                   | 74.94       |
| 4                         | NM_025404.3           | <i>Arl4d</i>         | 6.19                   | 73.18       |
| 5                         | NM_007707.3           | <i>Socs3</i>         | 6.03                   | 65.5        |
| 6                         | NM_009140.2           | <i>Cxcl2</i>         | 5.79                   | 55.22       |
| 7                         | NM_177371.3           | <i>Tnfsf15</i>       | 5.77                   | 54.76       |
| 8                         | NM_011198.3           | <i>Ptgs2</i>         | 5.15                   | 35.42       |
| 9                         | NM_008230.5           | <i>Hdc</i>           | 4.99                   | 31.72       |
| 10                        | NM_013599.2           | <i>Mmp9</i>          | 4.91                   | 30.02       |
| 11                        | NM_011610.3           | <i>Tnfrsf1b</i>      | 4.84                   | 28.67       |
| 12                        | NM_001044384.1        | <i>Timp1</i>         | 4.81                   | 28.11       |
| 13                        | NM_008321.2           | <i>Id3</i>           | 4.64                   | 24.88       |
| 14                        | NM_001039701.3        | <i>Il1rn</i>         | 4.52                   | 23          |
| 15                        | NM_007836.1           | <i>Gadd45a</i>       | 4.32                   | 20.03       |
| 16                        | NM_017466.4           | <i>Ccl2</i>          | 4.28                   | 19.47       |
| 17                        | NM_021384.4           | <i>Rsad2</i>         | 4.24                   | 18.9        |
| 18                        | NM_011113.3           | <i>Plaur</i>         | 4.2                    | 18.33       |
| 19                        | NM_010259.2           | <i>Gbp1</i>          | 4.18                   | 18.12       |
| 20                        | NM_009396.2           | <i>Tnfaip2</i>       | 4.16                   | 17.9        |
| 21                        | NR_033554.1           | <i>D330041H03Rik</i> | 4.11                   | 17.3        |
| 22                        | NM_009895.3           | <i>Cish</i>          | 4.03                   | 16.33       |
| 23                        | NM_001077189.1        | <i>Fcgr2b</i>        | 4.02                   | 16.25       |
| 24                        | NM_013693.2           | <i>Tnf</i>           | 4.01                   | 16.07       |
| 25                        | NM_021394.2           | <i>Zbp1</i>          | 4                      | 15.99       |
| 26                        | NM_008655.1           | <i>Gadd45b</i>       | 3.87                   | 14.59       |
| 27                        | NM_001159395.1        | <i>Nfkbiz</i>        | 3.83                   | 14.21       |
| 28                        | NM_010187.2           | <i>Fcgr2b</i>        | 3.82                   | 14.13       |
| 29                        | NM_008655.1           | <i>Gadd45b</i>       | 3.8                    | 13.91       |
| 30                        | NM_030701.3           | <i>Niacr1</i>        | 3.76                   | 13.57       |
| 31                        | NM_023044.2           | <i>Slc15a3</i>       | 3.76                   | 13.53       |

|    |                |                 |      |       |
|----|----------------|-----------------|------|-------|
| 32 | NM_008331.3    | <i>Ifit1</i>    | 3.74 | 13.39 |
| 33 | NM_174850.3    | <i>Micall2</i>  | 3.74 | 13.32 |
| 34 | NM_030701.3    | <i>Niacr1</i>   | 3.73 | 13.26 |
| 35 | NM_021274.2    | <i>Cxcl10</i>   | 3.67 | 12.71 |
| 36 | NM_007987.2    | <i>Fas</i>      | 3.66 | 12.65 |
| 37 | NM_010484.2    | <i>Slc6a4</i>   | 3.59 | 12.07 |
| 38 | NM_015790.3    | <i>Icosl</i>    | 3.5  | 11.34 |
| 39 | NM_025541.3    | <i>Asf1a</i>    | 3.47 | 11.11 |
| 40 | NM_011333.3    | <i>Ccl2</i>     | 3.47 | 11.09 |
| 41 | NM_145636.1    | <i>Il27</i>     | 3.42 | 10.68 |
| 42 | NM_152804.2    | <i>Plk2</i>     | 3.42 | 10.67 |
| 43 | NM_053108.4    | <i>Glrx</i>     | 3.36 | 10.28 |
| 44 | NM_019777.3    | <i>Ikbke</i>    | 3.32 | 10.01 |
| 45 | NM_008842.3    | <i>Pim1</i>     | 3.32 | 10    |
| 46 | NM_134102.4    | <i>Pla1a</i>    | 3.32 | 9.96  |
| 47 | NM_207231.1    | <i>Arl5c</i>    | 3.31 | 9.91  |
| 48 | NM_010846.1    | <i>Mxl1</i>     | 3.3  | 9.84  |
| 49 | NM_009344.3    | <i>Phlda1</i>   | 3.29 | 9.76  |
| 50 | NM_009344.3    | <i>Phlda1</i>   | 3.28 | 9.69  |
| 51 | NM_010260.1    | <i>Gbp2</i>     | 3.26 | 9.59  |
| 52 | NM_026929.4    | <i>Chac1</i>    | 3.26 | 9.59  |
| 53 | NM_030720.1    | <i>Gpr84</i>    | 3.26 | 9.58  |
| 54 | NM_009397.3    | <i>Tnfaip3</i>  | 3.24 | 9.47  |
| 55 | NM_011607.3    | <i>Tnc</i>      | 3.19 | 9.1   |
| 56 | NM_153159.2    | <i>Zc3h12a</i>  | 3.16 | 8.91  |
| 57 | NM_001013365.2 | <i>Osm</i>      | 3.15 | 8.85  |
| 58 | NM_133662.2    | <i>Ier3</i>     | 3.13 | 8.77  |
| 59 | NM_172989.1    | <i>Lpar1</i>    | 3.13 | 8.74  |
| 60 | NM_019948.2    | <i>Clec4e</i>   | 3.12 | 8.69  |
| 61 | NM_001177982.1 | <i>Pde4b</i>    | 3.12 | 8.67  |
| 62 | NM_001113527.1 | <i>Isg20</i>    | 3.11 | 8.66  |
| 63 | NM_008871.2    | <i>Serpine1</i> | 3.11 | 8.66  |
| 64 | NM_013807.2    | <i>Plk3</i>     | 3.09 | 8.54  |
| 65 | NM_178890.3    | <i>Abtb2</i>    | 3.09 | 8.51  |
| 66 | NM_008329.2    | <i>Ifi204</i>   | 3.08 | 8.48  |
| 67 | NM_009421.3    | <i>Traf1</i>    | 3.08 | 8.48  |
| 68 | NM_172833.2    | <i>Malt1</i>    | 3.02 | 8.12  |

|     |                |                      |      |      |
|-----|----------------|----------------------|------|------|
| 69  | NM_013653.3    | <i>Ccl5</i>          | 3.01 | 8.08 |
| 70  | NM_009704.3    | <i>Areg</i>          | 2.99 | 7.94 |
| 71  | NM_175093.2    | <i>Trib3</i>         | 2.99 | 7.92 |
| 72  | NM_026985.1    | <i>I810033B17Rik</i> | 2.97 | 7.84 |
| 73  | NM_010807.4    | <i>Marcksl1</i>      | 2.96 | 7.8  |
| 74  | NM_001005846.2 | <i>Mcoln2</i>        | 2.96 | 7.77 |
| 75  | NM_010090.2    | <i>Dusp2</i>         | 2.89 | 7.39 |
| 76  | NM_001048054.1 | <i>Dusp16</i>        | 2.85 | 7.21 |
| 77  | NM_001025606.1 | <i>Tmem171</i>       | 2.82 | 7.08 |
| 78  | NM_010577.3    | <i>Itga5</i>         | 2.82 | 7.06 |
| 79  | NM_001005858.3 | <i>I830012O16Rik</i> | 2.82 | 7.04 |
| 80  | NM_007528.3    | <i>Bcl6b</i>         | 2.78 | 6.85 |
| 81  | NM_018734.3    | <i>Gbp3</i>          | 2.75 | 6.75 |
| 82  | NM_011756.4    | <i>Zfp36</i>         | 2.74 | 6.66 |
| 83  | NM_015783.3    | <i>Isg15</i>         | 2.72 | 6.58 |
| 84  | NM_008332.3    | <i>Ifit2</i>         | 2.71 | 6.53 |
| 85  | NM_001163591.1 | <i>Stx11</i>         | 2.71 | 6.52 |
| 86  | NM_026097.3    | <i>Rffl</i>          | 2.68 | 6.42 |
| 87  | NM_027871.1    | <i>Arhgef3</i>       | 2.67 | 6.35 |
| 88  | NM_011267.3    | <i>Rgs16</i>         | 2.64 | 6.23 |
| 89  | NM_011361.3    | <i>Sgk1</i>          | 2.64 | 6.23 |
| 90  | NM_025286.2    | <i>Slc31a2</i>       | 2.64 | 6.22 |
| 91  | NM_011227.1    | <i>Rab20</i>         | 2.61 | 6.09 |
| 92  | NM_009506.2    | <i>Vegfc</i>         | 2.6  | 6.06 |
| 93  | NM_009044.2    | <i>Rel</i>           | 2.6  | 6.05 |
| 94  | NM_010235.2    | <i>Fosl1</i>         | 2.59 | 6.02 |
| 95  | NM_011426.3    | <i>Siglec1</i>       | 2.58 | 5.96 |
| 96  | NM_008102.3    | <i>Gch1</i>          | 2.57 | 5.95 |
| 97  | NM_001025395.2 | <i>Src</i>           | 2.57 | 5.94 |
| 98  | NM_001048054.1 | <i>Dusp16</i>        | 2.56 | 5.9  |
| 99  | NM_011057.3    | <i>Pdgfb</i>         | 2.54 | 5.82 |
| 100 | NM_001002927.2 | <i>Penk</i>          | 2.54 | 5.82 |
| 101 | NM_001045526.2 | <i>A430084P05Rik</i> | 2.53 | 5.77 |
| 102 | NM_026772.2    | <i>Cdc42ep2</i>      | 2.5  | 5.65 |
| 103 | NM_008714.3    | <i>Notch1</i>        | 2.46 | 5.5  |
| 104 | NM_001146161.1 | <i>Slc11a2</i>       | 2.45 | 5.47 |
| 105 | NM_029537.1    | <i>Tmem98</i>        | 2.45 | 5.47 |

|     |                |                      |      |      |
|-----|----------------|----------------------|------|------|
| 106 | NM_007754.2    | <i>Cpd</i>           | 2.45 | 5.46 |
| 107 | NM_008416.3    | <i>Junb</i>          | 2.42 | 5.37 |
| 108 | NM_001164477.1 | <i>Ifih1</i>         | 2.42 | 5.36 |
| 109 | NM_001040397.4 | <i>Filip1l</i>       | 2.41 | 5.31 |
| 110 | NM_028800.3    | <i>Stk40</i>         | 2.4  | 5.28 |
| 111 | NM_134133.2    | <i>2010002N04Rik</i> | 2.39 | 5.25 |
| 112 | NM_007498.3    | <i>Atf3</i>          | 2.38 | 5.22 |
| 113 | NM_133753.1    | <i>Errfi1</i>        | 2.37 | 5.18 |
| 114 | NM_011410.2    | <i>Slfh4</i>         | 2.36 | 5.13 |
| 115 | NM_001163591.1 | <i>Stx11</i>         | 2.34 | 5.08 |
| 116 | NM_001191008.1 | <i>Sstr5</i>         | 2.34 | 5.07 |
| 117 | NM_013612.2    | <i>Slc11a1</i>       | 2.34 | 5.06 |
| 118 | NM_009779.2    | <i>C3ar1</i>         | 2.33 | 5.02 |
| 119 | NM_011408.1    | <i>Slfh2</i>         | 2.32 | 5    |
| 120 | NM_008654.2    | <i>Ppp1r15a</i>      | 2.32 | 4.99 |
| 121 | NM_001164220.1 | <i>Trim13</i>        | 2.31 | 4.97 |
| 122 | NM_008348.2    | <i>Il10ra</i>        | 2.3  | 4.93 |
| 123 | NM_011854.2    | <i>Oasl2</i>         | 2.28 | 4.84 |
| 124 | NM_010119.5    | <i>Ehd1</i>          | 2.26 | 4.78 |
| 125 | NR_027888.1    | <i>Sqrdl</i>         | 2.25 | 4.77 |
| 126 | NM_010208.4    | <i>Fgr</i>           | 2.25 | 4.76 |
| 127 | XM_003084664.1 | <i>Sh2d6</i>         | 2.25 | 4.76 |
| 128 | NR_029565.1    | <i>Mir155</i>        | 2.23 | 4.7  |
| 129 | NM_001243039.1 | <i>Gvin1</i>         | 2.23 | 4.68 |
| 130 | NM_020557.4    | <i>Cmpk2</i>         | 2.22 | 4.65 |
| 131 | NM_183201.4    | <i>Slfh5</i>         | 2.21 | 4.64 |
| 132 | NM_026644.2    | <i>Agpat4</i>        | 2.21 | 4.61 |
| 133 | NM_001081180.1 | <i>Spink5</i>        | 2.2  | 4.58 |
| 134 | NM_001093766.1 | <i>Myadm</i>         | 2.17 | 4.5  |
| 135 | NM_010755.3    | <i>Maff</i>          | 2.16 | 4.46 |
| 136 | NM_028127.3    | <i>Frmd6</i>         | 2.15 | 4.43 |
| 137 | NM_008416.3    | <i>Junb</i>          | 2.14 | 4.42 |
| 138 | NM_013470.2    | <i>Anxa3</i>         | 2.13 | 4.38 |
| 139 | NM_023061.2    | <i>Mcam</i>          | 2.13 | 4.38 |
| 140 | NM_001142706.1 | <i>Cfb</i>           | 2.13 | 4.37 |
| 141 | NM_176913.3    | <i>Dpep2</i>         | 2.11 | 4.31 |
| 142 | NM_009132.2    | <i>Scin</i>          | 2.11 | 4.31 |

|     |                |                      |      |      |
|-----|----------------|----------------------|------|------|
| 143 | NM_001082552.1 | <i>Trim21</i>        | 2.09 | 4.26 |
| 144 | NM_008132.2    | <i>Glrp1</i>         | 2.08 | 4.22 |
| 145 | NM_027494.3    | <i>Zcchc8</i>        | 2.05 | 4.15 |
| 146 | NM_001159301.1 | <i>Lgals9</i>        | 2.05 | 4.15 |
| 147 | NM_001145835.1 | <i>Ralgds</i>        | 2.05 | 4.13 |
| 148 | NM_001163565.1 | <i>Ptpn5</i>         | 2.05 | 4.13 |
| 149 | NM_001167680.1 | <i>Rhbdf2</i>        | 2.03 | 4.07 |
| 150 | NM_145953.2    | <i>Cth</i>           | 2.02 | 4.06 |
| 151 | NM_145209.3    | <i>Oasl1</i>         | 2.02 | 4.05 |
| 152 | NM_015789.3    | <i>Dkk11</i>         | 2.01 | 4.03 |
| 153 | NM_028807.3    | <i>1200009I06Rik</i> | 2.01 | 4.02 |
| 154 | NM_028967.1    | <i>Batf2</i>         | 1.99 | 3.98 |
| 155 | NM_008327.2    | <i>Ifi202b</i>       | 1.97 | 3.91 |
| 156 | NM_013532.2    | <i>Lilrb4</i>        | 1.97 | 3.91 |
| 157 | NM_011338.2    | <i>Ccl9</i>          | 1.97 | 3.91 |
| 158 | XR_001627.2    | <i>Gm8995</i>        | 1.96 | 3.88 |
| 159 | NM_018807.5    | <i>Plagl2</i>        | 1.95 | 3.86 |
| 160 | NM_001045514.2 | <i>Akna</i>          | 1.94 | 3.85 |
| 161 | NM_011521.2    | <i>Sdc4</i>          | 1.94 | 3.83 |
| 162 | NM_207652.2    | <i>Tsc22d1</i>       | 1.94 | 3.83 |
| 163 | NM_019549.2    | <i>Plek</i>          | 1.93 | 3.82 |
| 164 | NM_008330.1    | <i>Ifi47</i>         | 1.93 | 3.81 |
| 165 | NM_015747.2    | <i>Slc20a1</i>       | 1.93 | 3.8  |
| 166 | NM_009288.2    | <i>Stk10</i>         | 1.92 | 3.79 |
| 167 | NM_008630.2    | <i>Mt2</i>           | 1.91 | 3.77 |
| 168 | NM_145828.3    | <i>Xylt2</i>         | 1.91 | 3.76 |
| 169 | NM_001004174.1 | <i>AA467197</i>      | 1.91 | 3.76 |
| 170 | NM_001099624.2 | <i>Rapegf2</i>       | 1.91 | 3.75 |
| 171 | NM_013673.3    | <i>Sp100</i>         | 1.9  | 3.73 |
| 172 | NR_003508.1    | <i>Mx2</i>           | 1.9  | 3.73 |
| 173 | NM_001164220.1 | <i>Trim13</i>        | 1.9  | 3.73 |
| 174 | NM_011777.2    | <i>Zyx</i>           | 1.89 | 3.71 |
| 175 | NM_177371.3    | <i>Tnfsf15</i>       | 1.88 | 3.69 |
| 176 | NM_001093766.1 | <i>Myadm</i>         | 1.88 | 3.68 |
| 177 | NM_013867.2    | <i>Bcar3</i>         | 1.88 | 3.68 |
| 178 | NM_028679.3    | <i>Irak3</i>         | 1.86 | 3.63 |
| 179 | NM_011400.3    | <i>Slc2a1</i>        | 1.85 | 3.61 |

|     |                |                     |      |      |
|-----|----------------|---------------------|------|------|
| 180 | NM_025638.2    | <i>Gdpd1</i>        | 1.85 | 3.6  |
| 181 | NM_007413.4    | <i>Adora2b</i>      | 1.85 | 3.6  |
| 182 | NR_029806.1    | <i>Mir221</i>       | 1.85 | 3.59 |
| 183 | NM_175437.3    | <i>Pion</i>         | 1.85 | 3.59 |
| 184 | NM_023516.5    | <i>Hilpda</i>       | 1.84 | 3.58 |
| 185 | NM_011990.2    | <i>Slc7a11</i>      | 1.83 | 3.57 |
| 186 | NM_023380.2    | <i>Samsn1</i>       | 1.83 | 3.56 |
| 187 | NM_008102.3    | <i>Gch1</i>         | 1.83 | 3.55 |
| 188 | NM_007484.2    | <i>Rhoc</i>         | 1.82 | 3.53 |
| 189 | NM_030684.3    | <i>Trim34a</i>      | 1.82 | 3.52 |
| 190 | NM_023516.5    | <i>Hilpda</i>       | 1.79 | 3.45 |
| 191 | NM_018782.2    | <i>Calcr1</i>       | 1.78 | 3.45 |
| 192 | NM_011110.4    | <i>Pla2g5</i>       | 1.78 | 3.44 |
| 193 | NM_172603.3    | <i>Phf1</i>         | 1.78 | 3.43 |
| 194 | NM_011577.1    | <i>Tgfb1</i>        | 1.78 | 3.43 |
| 195 | NM_013652.2    | <i>Ccl4</i>         | 1.78 | 3.43 |
| 196 | NM_001199276.1 | <i>Tnip1</i>        | 1.77 | 3.41 |
| 197 | NM_009743.4    | <i>Bcl2l1</i>       | 1.77 | 3.41 |
| 198 | XM_003086779.1 | <i>LOC100504934</i> | 1.77 | 3.4  |
| 199 | NM_001039530.3 | <i>Parp14</i>       | 1.76 | 3.4  |
| 200 | NM_001205044.1 | <i>Jarid2</i>       | 1.76 | 3.38 |
| 201 | NM_029083.2    | <i>Ddit4</i>        | 1.76 | 3.38 |
| 202 | NM_176933.4    | <i>Dusp4</i>        | 1.76 | 3.38 |
| 203 | NM_019738.1    | <i>Nupr1</i>        | 1.75 | 3.37 |
| 204 | NM_007729.2    | <i>Col11a1</i>      | 1.75 | 3.36 |
| 205 | NM_001199305.1 | <i>Atxn1</i>        | 1.75 | 3.36 |
| 206 | NM_001126047.1 | <i>Sema4c</i>       | 1.75 | 3.36 |
| 207 | NM_001172117.1 | <i>Hck</i>          | 1.74 | 3.34 |
| 208 | NM_001135657.1 | <i>Ptprj</i>        | 1.72 | 3.3  |
| 209 | NM_177794.3    | <i>Tmem26</i>       | 1.72 | 3.3  |
| 210 | NM_010499.4    | <i>Ier2</i>         | 1.71 | 3.28 |
| 211 | NM_032000.2    | <i>Trps1</i>        | 1.71 | 3.27 |
| 212 | NM_028186.4    | <i>Nkd2</i>         | 1.71 | 3.27 |
| 213 | NM_153074.3    | <i>Lrrc25</i>       | 1.7  | 3.25 |
| 214 | NM_144797.3    | <i>Metrn1</i>       | 1.7  | 3.25 |
| 215 | NM_001162883.1 | <i>Apol9</i>        | 1.7  | 3.25 |
| 216 | NM_001048177.1 | <i>Jak2</i>         | 1.7  | 3.24 |

|     |                |                      |      |      |
|-----|----------------|----------------------|------|------|
| 217 | NM_001199733.1 | <i>Daxx</i>          | 1.7  | 3.24 |
| 218 | NM_018738.4    | <i>Igtp</i>          | 1.69 | 3.23 |
| 219 | NM_053244.5    | <i>Kiss1r</i>        | 1.68 | 3.21 |
| 220 | NM_007392.2    | <i>Acta2</i>         | 1.66 | 3.16 |
| 221 | NM_019549.2    | <i>Plek</i>          | 1.65 | 3.14 |
| 222 | NM_183148.3    | <i>Iffo2</i>         | 1.64 | 3.12 |
| 223 | NM_010442.2    | <i>Hmox1</i>         | 1.64 | 3.11 |
| 224 | NM_138953.2    | <i>Ell2</i>          | 1.64 | 3.11 |
| 225 | NM_172145.3    | <i>Fam176b</i>       | 1.63 | 3.11 |
| 226 | NM_008326.1    | <i>Irgm1</i>         | 1.63 | 3.1  |
| 227 | NM_011018.2    | <i>Sqstm1</i>        | 1.63 | 3.1  |
| 228 | NR_015466.1    | <i>7530420F21Rik</i> | 1.63 | 3.1  |
| 229 | NM_013671.3    | <i>Sod2</i>          | 1.62 | 3.07 |
| 230 | NM_199241.2,   | <i>Sema6d</i>        | 1.61 | 3.05 |
| 231 | NM_011731.3    | <i>Slc6a20b</i>      | 1.58 | 2.99 |
| 232 | NM_010908.4    | <i>Nfkbib</i>        | 1.58 | 2.98 |
| 233 | XR_140714.1    | <i>Gm9640</i>        | 1.57 | 2.98 |
| 234 | NM_010720.3    | <i>Lipg</i>          | 1.55 | 2.94 |
| 235 | NM_172442.3    | <i>Dtx4</i>          | 1.55 | 2.92 |
| 236 | NM_021334.2    | <i>Itgax</i>         | 1.54 | 2.91 |
| 237 | NM_010495.2    | <i>Id1</i>           | 1.54 | 2.91 |
| 238 | NM_001037298.1 | <i>Fam38a</i>        | 1.53 | 2.89 |
| 239 | NM_019440.3    | <i>Irgm2</i>         | 1.52 | 2.87 |
| 240 | NM_010499.4    | <i>Ier2</i>          | 1.52 | 2.86 |
| 241 | NM_026835.2    | <i>Ms4a6d</i>        | 1.52 | 2.86 |
| 242 | NM_001177370.1 | <i>Nfkb2</i>         | 1.51 | 2.85 |
| 243 | NM_001160379.1 | <i>Fam46a</i>        | 1.5  | 2.83 |
| 244 | NM_029478.3    | <i>Vmp1</i>          | 1.5  | 2.83 |
| 245 | NR_015566.2    | <i>A330023F24Rik</i> | 1.5  | 2.82 |
| 246 | NM_001160379.1 | <i>Fam46a</i>        | 1.5  | 2.82 |
| 247 | NM_022331.1    | <i>Herpud1</i>       | 1.5  | 2.82 |
| 248 | NM_001162921.1 | <i>Zc3h12c</i>       | 1.49 | 2.82 |
| 249 | NM_175512.2    | <i>Dhrs9</i>         | 1.49 | 2.82 |
| 250 | XM_001477846.2 | <i>Rnf213</i>        | 1.49 | 2.81 |
| 251 | NM_153543.2    | <i>Aldh1l2</i>       | 1.49 | 2.81 |
| 252 | NM_017373.3    | <i>Nfil3</i>         | 1.49 | 2.8  |
| 253 | NM_145950.4    | <i>Osgin2</i>        | 1.48 | 2.8  |



|                             |                |                      |       |       |
|-----------------------------|----------------|----------------------|-------|-------|
| 254                         | NM_001252601.1 | <i>Irf7</i>          | 1.48  | 2.79  |
| 255                         | NM_025821.2    | <i>Carhsp1</i>       | 1.48  | 2.79  |
| 256                         | NM_001040400.2 | <i>Tet2</i>          | 1.48  | 2.79  |
| 257                         | NM_009627.1    | <i>Adm</i>           | 1.48  | 2.79  |
| 258                         | NR_028478.1    | <i>Snora75</i>       | 1.47  | 2.78  |
| 259                         | NM_001163556.1 | <i>Pou2f2</i>        | 1.46  | 2.76  |
| 260                         | NM_011212.3    | <i>Ptpre</i>         | 1.46  | 2.75  |
| 261                         | NM_001163470.1 | <i>Traf1</i>         | 1.46  | 2.75  |
| 262                         | NM_080844.4    | <i>Serpinc1</i>      | 1.45  | 2.74  |
| 263                         | NM_183162.2    | <i>BC006779</i>      | 1.45  | 2.74  |
| 264                         | NM_172684.2    | <i>Rsb1</i>          | 1.45  | 2.73  |
| 265                         | NM_018861.3    | <i>Slc1a4</i>        | 1.45  | 2.73  |
| 266                         | NM_007679.4    | <i>Cebpd</i>         | 1.45  | 2.72  |
| <b>Down-regulated genes</b> |                |                      |       |       |
| 1                           | NM_001252506.1 | <i>St6gal1</i>       | -6.05 | 66.27 |
| 2                           | NM_029116.2    | <i>Kbtbd11</i>       | -4.47 | 22.17 |
| 3                           | NM_007642.4    | <i>Cd28</i>          | -4.39 | 20.9  |
| 4                           | NM_001081656.2 | <i>Neurl1b</i>       | -4.23 | 18.79 |
| 5                           | NM_025768.2    | <i>Grtp1</i>         | -4.13 | 17.54 |
| 6                           | NM_022886.2    | <i>Scel</i>          | -4.12 | 17.37 |
| 7                           | NM_144879.2    | <i>Vash2</i>         | -4.07 | 16.76 |
| 8                           | NM_020581.2    | <i>Angpt4</i>        | -3.96 | 15.6  |
| 9                           | NM_027543.3    | <i>Gpr173</i>        | -3.95 | 15.48 |
| 10                          | NM_007426.3    | <i>Angpt2</i>        | -3.9  | 14.92 |
| 11                          | NM_198024.1    | <i>Ranbp3l</i>       | -3.84 | 14.3  |
| 12                          | NM_145611.4    | <i>Kank2</i>         | -3.72 | 13.17 |
| 13                          | NM_024124.3    | <i>Hdac9</i>         | -3.71 | 13.05 |
| 14                          | NM_008278.2    | <i>Hpgd</i>          | -3.62 | 12.26 |
| 15                          | NM_198024.1    | <i>Ranbp3l</i>       | -3.58 | 11.96 |
| 16                          | NM_011459.4    | <i>Serpinb8</i>      | -3.56 | 11.77 |
| 17                          | NM_001167592.2 | <i>Gm17365</i>       | -3.5  | 11.32 |
| 18                          | NM_001004156.2 | <i>Plekhg5</i>       | -3.47 | 11.1  |
| 19                          | NM_023850.2    | <i>Chst1</i>         | -3.45 | 10.96 |
| 20                          | NM_001130186.1 | <i>Phf17</i>         | -3.39 | 10.51 |
| 21                          | NM_011027.2    | <i>P2rx7</i>         | -3.38 | 10.38 |
| 22                          | XM_003689164.1 | <i>LOC100504500</i>  | -3.37 | 10.31 |
| 23                          | NM_177000.3    | <i>C130050O18Rik</i> | -3.34 | 10.13 |

|    |                |                      |       |      |
|----|----------------|----------------------|-------|------|
| 24 | NM_008278.2    | <i>Hpgd</i>          | -3.31 | 9.94 |
| 25 | NM_017480.2    | <i>Icos</i>          | -3.31 | 9.89 |
| 26 | NM_028340.     | <i>Susd3</i>         | -3.3  | 9.88 |
| 27 | NM_001143777.1 | <i>Fam13c</i>        | -3.28 | 9.72 |
| 28 | NM_001170643.1 | <i>Rnf144b</i>       | -3.25 | 9.54 |
| 29 | NM_028039.2    | <i>Esco2</i>         | -3.24 | 9.46 |
| 30 | NM_178667.4    | <i>Tfdp2</i>         | -3.19 | 9.12 |
| 31 | NM_028149.1    | <i>Fbxl20</i>        | -3.16 | 8.97 |
| 32 | NM_001163616.1 | <i>1810011H11Rik</i> | -3.13 | 8.77 |
| 33 | NM_009025.2    | <i>Rasa3</i>         | -3.09 | 8.54 |
| 34 | NM_178699.4    | <i>B930041F14Rik</i> | -3.08 | 8.48 |
| 35 | NM_001195006.1 | <i>Ndrp4</i>         | -3.08 | 8.46 |
| 36 | NM_001168492.1 | <i>Pdcd4</i>         | -3.08 | 8.46 |
| 37 | NM_013627.5    | <i>Pax6</i>          | -3.08 | 8.45 |
| 38 | NM_053261.2    | <i>Impa2</i>         | -3.06 | 8.34 |
| 39 | NM_011243.1    | <i>Rarb</i>          | -3.06 | 8.33 |
| 40 | NM_001039231.3 | <i>Zfp951</i>        | -3.05 | 8.3  |
| 41 | NM_001204241.1 | <i>Clec4a3</i>       | -3.04 | 8.24 |
| 42 | NM_001162425.1 | <i>Efnal</i>         | -3.04 | 8.2  |
| 43 | NM_001081098.1 | <i>Zfp362</i>        | -3.03 | 8.16 |
| 44 | NM_013495.2    | <i>Cpt1a</i>         | -3.02 | 8.11 |
| 45 | NM_001168491.1 | <i>Pdcd4</i>         | -2.97 | 7.84 |
| 46 | NM_133746.5    | <i>Calhm2</i>        | -2.97 | 7.81 |
| 47 | NM_001081079.1 | <i>Ogfrl1</i>        | -2.96 | 7.78 |
| 48 | NM_027763.1    | <i>Trem11</i>        | -2.95 | 7.74 |
| 49 | NM_001199105.1 | <i>Trp53inp1</i>     | -2.94 | 7.67 |
| 50 | NM_001114312.1 | <i>4930506M07Rik</i> | -2.94 | 7.67 |
| 51 | NM_001037134.1 | <i>Ccne2</i>         | -2.93 | 7.64 |
| 52 | NM_025294.5    | <i>Gm16515</i>       | -2.92 | 7.55 |
| 53 | NM_001190950.1 | <i>Kcne3</i>         | -2.9  | 7.46 |
| 54 | NM_146208.2    | <i>Neil3</i>         | -2.9  | 7.46 |
| 55 | NM_025995.2    | <i>Fbxo5</i>         | -2.88 | 7.38 |
| 56 | NM_001013368.5 | <i>E2f8</i>          | -2.87 | 7.31 |
| 57 | NM_030198.3    | <i>Gins3</i>         | -2.87 | 7.31 |
| 58 | NM_018822.3    | <i>Sgsh</i>          | -2.87 | 7.3  |
| 59 | NM_001013377.2 | <i>E130306D19Rik</i> | -2.87 | 7.29 |
| 60 | NM_145434.3    | <i>Nr1d1</i>         | -2.86 | 7.26 |

|    |                |                      |       |      |
|----|----------------|----------------------|-------|------|
| 61 | NM_009846.2    | <i>Cd24a</i>         | -2.85 | 7.22 |
| 62 | NM_001163256.1 | <i>Fblim1</i>        | -2.85 | 7.2  |
| 63 | NM_007930.4    | <i>Enc1</i>          | -2.84 | 7.18 |
| 64 | NM_017391.3    | <i>Slc5a3</i>        | -2.83 | 7.12 |
| 65 | NM_001145959.1 | <i>Ndrp2</i>         | -2.82 | 7.05 |
| 66 | NM_134189.2    | <i>Galnt10</i>       | -2.82 | 7.05 |
| 67 | NM_133898.4    | <i>N4bp2l1</i>       | -2.81 | 7.02 |
| 68 | NM_172756.2    | <i>Ankle1</i>        | -2.8  | 6.98 |
| 69 | NM_001130412.1 | <i>Lpin1</i>         | -2.8  | 6.95 |
| 70 | XR_106143.1    | <i>G430095P16Rik</i> | -2.79 | 6.93 |
| 71 | NM_172598.3    | <i>Wdhd1</i>         | -2.79 | 6.89 |
| 72 | NM_153388.4    | <i>Lrfr4</i>         | -2.78 | 6.86 |
| 73 | NM_183031.2    | <i>Gpr183</i>        | -2.77 | 6.83 |
| 74 | NM_145462.2    | <i>Haus4</i>         | -2.77 | 6.81 |
| 75 | NM_028763.3    | <i>Cbx6</i>          | -2.76 | 6.78 |
| 76 | NM_138313.3    | <i>Bmf</i>           | -2.75 | 6.72 |
| 77 | NM_026038.2    | <i>2810055F11Rik</i> | -2.75 | 6.71 |
| 78 | NM_028995.3    | <i>Nipal3</i>        | -2.74 | 6.68 |
| 79 | NM_001145832.1 | <i>Kifc3</i>         | -2.74 | 6.68 |
| 80 | NM_146040.1    | <i>Cdca7l</i>        | -2.73 | 6.62 |
| 81 | NM_001113283.1 | <i>BC031353</i>      | -2.71 | 6.56 |
| 82 | NM_176837.2    | <i>Arhgap18</i>      | -2.71 | 6.55 |
| 83 | NM_001170643.1 | <i>Rnf144b</i>       | -2.71 | 6.55 |
| 84 | NM_009806.2    | <i>Cask</i>          | -2.7  | 6.52 |
| 85 | NM_001163687.1 | <i>Naaa</i>          | -2.69 | 6.47 |
| 86 | NM_001080158.1 | <i>Cenpm</i>         | -2.68 | 6.41 |
| 87 | NM_010049.3    | <i>Dhfr</i>          | -2.67 | 6.38 |
| 88 | NM_198861.1    | <i>BC046404</i>      | -2.67 | 6.37 |
| 89 | NM_177603.3    | <i>Frat2</i>         | -2.66 | 6.32 |
| 90 | NM_010412.3    | <i>Hdac5</i>         | -2.66 | 6.32 |
| 91 | NM_001085410.1 | <i>1110020G09Rik</i> | -2.66 | 6.31 |
| 92 | NM_001005421.4 | <i>Amical</i>        | -2.65 | 6.26 |
| 93 | NM_178220.3    | <i>Arrb1</i>         | -2.64 | 6.23 |
| 94 | NM_023794.2    | <i>Etv5</i>          | -2.64 | 6.23 |
| 95 | NM_145402.3    | <i>Tmem51</i>        | -2.63 | 6.19 |
| 96 | NM_197990.3    | <i>1700025G04Rik</i> | -2.62 | 6.15 |
| 97 | NM_001033306.1 | <i>Shb</i>           | -2.62 | 6.14 |

|     |                |                      |       |      |
|-----|----------------|----------------------|-------|------|
| 98  | NM_177733.6    | <i>E2f2</i>          | -2.61 | 6.12 |
| 99  | NM_009001.6    | <i>Rab3a</i>         | -2.61 | 6.12 |
| 100 | NM_001164112.1 | <i>Nfatc1</i>        | -2.61 | 6.1  |
| 101 | NM_020567.2    | <i>Gmnn</i>          | -2.61 | 6.09 |
| 102 | NM_198305.2    | <i>Klhl17</i>        | -2.6  | 6.07 |
| 103 | NM_009593.2    | <i>Abcg1</i>         | -2.6  | 6.04 |
| 104 | NM_153571.2    | <i>Hscb</i>          | -2.59 | 6.02 |
| 105 | NM_001114312.1 | <i>4930506M07Rik</i> | -2.59 | 6.02 |
| 106 | NM_023397.4    | <i>Mdp1</i>          | -2.58 | 5.98 |
| 107 | NM_023326.2    | <i>Bmyc</i>          | -2.57 | 5.92 |
| 108 | NM_001164101.1 | <i>Add3</i>          | -2.56 | 5.91 |
| 109 | NM_024459.2    | <i>Ppp3r1</i>        | -2.56 | 5.9  |
| 110 | NM_008628.2    | <i>Msh2</i>          | -2.56 | 5.89 |
| 111 | NM_025464.2    | <i>Tmem218</i>       | -2.54 | 5.81 |
| 112 | NM_173047.3    | <i>Cbr3</i>          | -2.53 | 5.77 |
| 113 | NM_001085492.1 | <i>Rere</i>          | -2.53 | 5.77 |
| 114 | NM_030198.3    | <i>Gins3</i>         | -2.52 | 5.72 |
| 115 | NM_145425.3    | <i>Wdpcp</i>         | -2.51 | 5.71 |
| 116 | NR_027827.1    | <i>A030009H04Rik</i> | -2.5  | 5.67 |
| 117 | NM_027973.3    | <i>Mlf1ip</i>        | -2.49 | 5.61 |
| 118 | NM_009079.2    | <i>Rpl22</i>         | -2.48 | 5.59 |
| 119 | NM_001242424.1 | <i>Fam105a</i>       | -2.47 | 5.53 |
| 120 | NM_007525.3    | <i>Bard1</i>         | -2.46 | 5.5  |
| 121 | NM_023733.3    | <i>Crot</i>          | -2.44 | 5.44 |
| 122 | NM_146073.3    | <i>Zdhhc14</i>       | -2.44 | 5.44 |
| 123 | NM_009154.2    | <i>Sema5a</i>        | -2.43 | 5.38 |
| 124 | NM_172838.3    | <i>Slc16a12</i>      | -2.42 | 5.37 |
| 125 | NM_181397.2    | <i>Rftn1</i>         | -2.42 | 5.35 |
| 126 | NM_178609.4    | <i>E2f7</i>          | -2.42 | 5.34 |
| 127 | NM_001115018.1 | <i>Suv420h2</i>      | -2.42 | 5.34 |
| 128 | NM_001163766.1 | <i>Wdr90</i>         | -2.41 | 5.33 |
| 129 | NM_029091.2    | <i>Klc4</i>          | -2.41 | 5.32 |
| 130 | NM_028639.3    | <i>Ttc7</i>          | -2.41 | 5.3  |
| 131 | NM_134126.3    | <i>Ift140</i>        | -2.4  | 5.29 |
| 132 | NM_001163764.1 | <i>Tcf19</i>         | -2.39 | 5.24 |
| 133 | NM_011391.1    | <i>Slc16a7</i>       | -2.39 | 5.24 |
| 134 | NM_001033162.2 | <i>1700012A16Rik</i> | -2.38 | 5.22 |

|     |                 |                      |       |      |
|-----|-----------------|----------------------|-------|------|
| 135 | NR_033402.1     | <i>Tyms</i>          | -2.38 | 5.21 |
| 136 | NM_183031.2     | <i>Gpr183</i>        | -2.38 | 5.2  |
| 137 | NM_001013370.2, | <i>Sesn1</i>         | -2.37 | 5.17 |
| 138 | NM_009662.2     | <i>Alox5</i>         | -2.36 | 5.14 |
| 139 | NM_176831.4     | <i>Ppcdc</i>         | -2.36 | 5.14 |
| 140 | NM_023431.5     | <i>Mum1</i>          | -2.36 | 5.13 |
| 141 | NM_153546.4     | <i>Mboat1</i>        | -2.35 | 5.11 |
| 142 | NM_145823.2     | <i>Pitpnc1</i>       | -2.35 | 5.11 |
| 143 | NM_001146176.1  | <i>Max</i>           | -2.35 | 5.08 |
| 144 | NM_172560.3     | <i>Cntrob</i>        | -2.34 | 5.06 |
| 145 | NM_028995.3     | <i>Nipal3</i>        | -2.34 | 5.05 |
| 146 | NM_178283.3     | <i>Asb13</i>         | -2.32 | 5    |
| 147 | NM_021476.4     | <i>Cysltrl</i>       | -2.32 | 4.99 |
| 148 | NM_001159538.1  | <i>Fgd2</i>          | -2.31 | 4.96 |
| 149 | NM_026410.3     | <i>Cdca5</i>         | -2.31 | 4.95 |
| 150 | NM_146008.2     | <i>Tcp11l2</i>       | -2.3  | 4.93 |
| 151 | NM_009828.2     | <i>Ccna2</i>         | -2.3  | 4.93 |
| 152 | NM_025823.4     | <i>Pcyox1</i>        | -2.3  | 4.92 |
| 153 | NM_134250.2     | <i>Havcr2</i>        | -2.29 | 4.9  |
| 154 | NM_001163761.1  | <i>6430548M08Rik</i> | -2.29 | 4.9  |
| 155 | NM_001163518.1  | <i>2410075B13Rik</i> | -2.29 | 4.9  |
| 156 | NM_198019.2     | <i>Cep78</i>         | -2.29 | 4.89 |
| 157 | NM_016681.3     | <i>Chek2</i>         | -2.27 | 4.84 |
| 158 | NM_133762.3     | <i>Ncapg2</i>        | -2.27 | 4.83 |
| 159 | NM_019976.3     | <i>Psrl1</i>         | -2.27 | 4.82 |
| 160 | NM_026720.2     | <i>Ankrd13d</i>      | -2.27 | 4.81 |
| 161 | NR_040293.1     | <i>2310040G24Rik</i> | -2.26 | 4.8  |
| 162 | NM_008737.2     | <i>Nrp1</i>          | -2.26 | 4.8  |
| 163 | NM_139145.4     | <i>Hlcs</i>          | -2.26 | 4.8  |
| 164 | NM_172310.2     | <i>Tarsl2</i>        | -2.26 | 4.8  |
| 165 | NM_001081415.1  | <i>Samd1</i>         | -2.26 | 4.79 |
| 166 | NM_009029.2     | <i>Rb1</i>           | -2.26 | 4.78 |
| 167 | NM_025341.3     | <i>Abhd6</i>         | -2.26 | 4.78 |
| 168 | NM_024264.4     | <i>Cyp27a1</i>       | -2.25 | 4.76 |
| 169 | NM_026662.4     | <i>Prps2</i>         | -2.25 | 4.76 |
| 170 | NM_001081241.2  | <i>Fam65a</i>        | -2.25 | 4.75 |
| 171 | NM_178677.4     | <i>Sec22c</i>        | -2.25 | 4.75 |

|     |                |                      |       |      |
|-----|----------------|----------------------|-------|------|
| 172 | NM_025341.3    | <i>Abhd6</i>         | -2.24 | 4.72 |
| 173 | NM_028232.2    | <i>Sgoll</i>         | -2.23 | 4.7  |
| 174 | NM_001146180.1 | <i>Mtss1</i>         | -2.23 | 4.69 |
| 175 | NR_030721.1    | <i>9130206I24Rik</i> | -2.23 | 4.69 |
| 176 | NM_010255.3    | <i>Gamt</i>          | -2.23 | 4.68 |
| 177 | NM_009427.2    | <i>Tob1</i>          | -2.21 | 4.63 |
| 178 | NM_008021.4    | <i>Foxm1</i>         | -2.21 | 4.63 |
| 179 | NM_028576.2    | <i>1700106N22Rik</i> | -2.21 | 4.63 |
| 180 | NM_029766.2    | <i>Dtl</i>           | -2.21 | 4.61 |
| 181 | NM_024208.4    | <i>Echdc3</i>        | -2.2  | 4.61 |
| 182 | NM_172260.3    | <i>Cep68</i>         | -2.2  | 4.61 |
| 183 | NM_001001806.2 | <i>Zfp36l2</i>       | -2.2  | 4.6  |
| 184 | NR_015585.1    | <i>4933439C10Rik</i> | -2.19 | 4.58 |
| 185 | NM_010830.2    | <i>Msh6</i>          | -2.19 | 4.58 |
| 186 | NM_138956.3    | <i>Rassf3</i>        | -2.19 | 4.57 |
| 187 | NM_007421.2    | <i>Adssl1</i>        | -2.19 | 4.57 |
| 188 | NM_144526.3    | <i>Fam64a</i>        | -2.19 | 4.55 |
| 189 | NM_177124.4    | <i>Tnrc6b</i>        | -2.18 | 4.53 |
| 190 | NM_177473.3    | <i>Tmem191c</i>      | -2.18 | 4.53 |
| 191 | NM_181039.2    | <i>Lphn1</i>         | -2.18 | 4.53 |
| 192 | NM_175383.2    | <i>B3gnt1</i>        | -2.18 | 4.52 |
| 193 | NM_019455.4    | <i>Hpgds</i>         | -2.17 | 4.51 |
| 194 | NM_021886.1    | <i>Cenph</i>         | -2.17 | 4.5  |
| 195 | NM_029482.1    | <i>4930579G24Rik</i> | -2.17 | 4.5  |
| 196 | NM_013926.1    | <i>Cbx8</i>          | -2.17 | 4.49 |
| 197 | NM_013788.2    | <i>Peg12</i>         | -2.17 | 4.49 |
| 198 | NM_201239.3    | <i>Rnase4</i>        | -2.16 | 4.47 |
| 199 | NM_010620.1    | <i>Kif15</i>         | -2.15 | 4.44 |
| 200 | NM_001170537.1 | <i>Mef2c</i>         | -2.15 | 4.43 |
| 201 | NM_175449.4    | <i>Fam26f</i>        | -2.15 | 4.43 |
| 202 | NM_007633.2    | <i>Ccne1</i>         | -2.15 | 4.43 |
| 203 | NM_001033352.3 | <i>Klhl21</i>        | -2.15 | 4.43 |
| 204 | NM_001170556.1 | <i>Prkag2</i>        | -2.14 | 4.42 |
| 205 | NM_173733.3    | <i>Suox</i>          | -2.14 | 4.41 |
| 206 | NM_009791.4    | <i>Aspm</i>          | -2.13 | 4.38 |
| 207 | NM_013750.2    | <i>Phlda3</i>        | -2.13 | 4.37 |
| 208 | NM_026967.4    | <i>Rhebl1</i>        | -2.12 | 4.35 |

|     |                |                      |       |      |
|-----|----------------|----------------------|-------|------|
| 209 | NM_001177544.1 | <i>Hist1h2ao</i>     | -2.12 | 4.33 |
| 210 | NM_001005420.1 | <i>Ppp1r26</i>       | -2.11 | 4.32 |
| 211 | NM_026875.2    | <i>Ypel3</i>         | -2.11 | 4.31 |
| 212 | NM_028543.3    | <i>Zfp763</i>        | -2.11 | 4.31 |
| 213 | NM_175384.4    | <i>Cdca2</i>         | -2.11 | 4.3  |
| 214 | NM_175554.4    | <i>Clspn</i>         | -2.1  | 4.3  |
| 215 | NM_178607.4    | <i>Rnf24</i>         | -2.1  | 4.28 |
| 216 | NM_177620.4    | <i>Rin3</i>          | -2.09 | 4.26 |
| 217 | NM_010424.4    | <i>Hfe</i>           | -2.09 | 4.26 |
| 218 | NM_008317.4    | <i>Hyal1</i>         | -2.08 | 4.24 |
| 219 | NM_172734.3    | <i>Stk38l</i>        | -2.08 | 4.24 |
| 220 | NM_144538.2    | <i>Rab3il1</i>       | -2.08 | 4.23 |
| 221 | NM_008652.2    | <i>Mybl2</i>         | -2.08 | 4.23 |
| 222 | NM_001033142.2 | <i>Rnf166</i>        | -2.07 | 4.21 |
| 223 | NM_010188.5    | <i>Fcgr3</i>         | -2.07 | 4.21 |
| 224 | NM_178694.3    | <i>Zer1</i>          | -2.07 | 4.19 |
| 225 | NM_138719.4    | <i>Gnb5</i>          | -2.07 | 4.19 |
| 226 | NM_031257.3    | <i>Plekha2</i>       | -2.06 | 4.18 |
| 227 | NM_028083.4    | <i>Chaf1b</i>        | -2.06 | 4.18 |
| 228 | NM_178214.3    | <i>Hist2h2be</i>     | -2.06 | 4.18 |
| 229 | NM_134050.4    | <i>Rab15</i>         | -2.06 | 4.16 |
| 230 | NM_134122.2    | <i>Nrm</i>           | -2.05 | 4.13 |
| 231 | NM_026436.3    | <i>Tmem86a</i>       | -2.04 | 4.13 |
| 232 | NM_030234.2    | <i>Wdr76</i>         | -2.04 | 4.11 |
| 233 | NM_178162.2    | <i>Agfg2</i>         | -2.04 | 4.1  |
| 234 | NM_026166.2    | <i>Ikbip</i>         | -2.04 | 4.1  |
| 235 | NM_012012.4    | <i>Exo1</i>          | -2.03 | 4.1  |
| 236 | NM_008832.2    | <i>Phka1</i>         | -2.03 | 4.1  |
| 237 | NM_001191044.1 | <i>Ddx43</i>         | -2.03 | 4.09 |
| 238 | NM_009387.2    | <i>Tk1</i>           | -2.03 | 4.09 |
| 239 | NR_015522.1    | <i>2810429I04Rik</i> | -2.03 | 4.08 |
| 240 | NM_001111080.1 | <i>Uhrf1</i>         | -2.03 | 4.08 |
| 241 | NM_175347.4    | <i>Srl</i>           | -2.03 | 4.08 |
| 242 | NM_030721.2    | <i>Acox3</i>         | -2.03 | 4.07 |
| 243 | NM_001167994.1 | <i>Trmt2b</i>        | -2.03 | 4.07 |
| 244 | NM_008253.3    | <i>Hmgb3</i>         | -2.02 | 4.05 |
| 245 | NM_175511.4    | <i>Fam78a</i>        | -2.01 | 4.03 |

|     |                |                      |       |      |
|-----|----------------|----------------------|-------|------|
| 246 | NM_027534.2    | <i>Kdsr</i>          | -2.01 | 4.03 |
| 247 | NM_198642.2    | <i>5031414D18Rik</i> | -2.01 | 4.02 |
| 248 | NM_026003.2    | <i>Smarca2</i>       | -2    | 4.01 |
| 249 | NM_134041.3    | <i>4930427A07Rik</i> | -2    | 3.99 |
| 250 | NM_015810.2    | <i>Polg2</i>         | -2    | 3.99 |
| 251 | NM_001109993.1 | <i>Tmem141</i>       | -1.99 | 3.98 |
| 252 | NM_007634.4    | <i>Ccnf</i>          | -1.99 | 3.98 |
| 253 | NM_145564.3    | <i>Fbxo21</i>        | -1.99 | 3.97 |
| 254 | NM_027975.2    | <i>Fam83d</i>        | -1.99 | 3.96 |
| 255 | NM_001033484.1 | <i>Iqgap3</i>        | -1.99 | 3.96 |
| 256 | NM_133669.4    | <i>Rp2h</i>          | -1.98 | 3.95 |
| 257 | NM_001113574.1 | <i>Brd3</i>          | -1.98 | 3.94 |
| 258 | NM_010580.2    | <i>Itgb5</i>         | -1.98 | 3.94 |
| 259 | NM_025998.3    | <i>Nkain1</i>        | -1.98 | 3.94 |
| 260 | NM_020271.3    | <i>Pdcp</i>          | -1.98 | 3.94 |
| 261 | NM_130895.3    | <i>Adarb1</i>        | -1.98 | 3.94 |
| 262 | NM_008567.1    | <i>Mcm6</i>          | -1.98 | 3.94 |
| 263 | NM_007705.2    | <i>Cirbp</i>         | -1.98 | 3.94 |
| 264 | NM_010559.2    | <i>Il6ra</i>         | -1.98 | 3.93 |
| 265 | NM_197943.2    | <i>Sgsm2</i>         | -1.97 | 3.93 |
| 266 | NM_001013026.2 | <i>Ttf2</i>          | -1.97 | 3.92 |
| 267 | NM_177372.3    | <i>Dna2</i>          | -1.97 | 3.91 |
| 268 | NM_023229.2    | <i>Fastk</i>         | -1.96 | 3.9  |
| 269 | NM_001199213.1 | <i>Serpnb12</i>      | -1.96 | 3.89 |
| 270 | NM_198299.1    | <i>E130303B06Rik</i> | -1.96 | 3.88 |
| 271 | NM_027106.4    | <i>Avp1l</i>         | -1.96 | 3.88 |
| 272 | NM_016974.3    | <i>Dbp</i>           | -1.95 | 3.87 |
| 273 | NM_008618.3    | <i>Mdh1</i>          | -1.95 | 3.87 |
| 274 | NM_010637.3    | <i>Klf4</i>          | -1.95 | 3.86 |
| 275 | NM_001199124.1 | <i>Spc25</i>         | -1.95 | 3.85 |
| 276 | NM_177583.4    | <i>Aph1b</i>         | -1.94 | 3.84 |
| 277 | NM_028657.3    | <i>F630110N24Rik</i> | -1.94 | 3.84 |
| 278 | NM_009104.2    | <i>Rrm2</i>          | -1.94 | 3.84 |
| 279 | NM_031182.2    | <i>Tfap4</i>         | -1.93 | 3.82 |
| 280 | NM_001177867.1 | <i>Sgol2</i>         | -1.93 | 3.82 |
| 281 | NM_013770.2    | <i>Slc25a10</i>      | -1.93 | 3.82 |
| 282 | NM_173437.2    | <i>Nav1</i>          | -1.93 | 3.82 |



|     |                |                      |       |      |
|-----|----------------|----------------------|-------|------|
| 283 | NM_178856.1    | <i>Gins2</i>         | -1.93 | 3.81 |
| 284 | NM_207204.2    | <i>Ninl</i>          | -1.93 | 3.81 |
| 285 | NM_010830.2    | <i>Msh6</i>          | -1.93 | 3.8  |
| 286 | NM_025857.2    | <i>Aagab</i>         | -1.93 | 3.8  |
| 287 | NM_145509.2    | <i>5430435G22Rik</i> | -1.92 | 3.79 |
| 288 | NM_178214.3    | <i>Hist2h2be</i>     | -1.92 | 3.79 |
| 289 | NM_008695.2    | <i>Nid2</i>          | -1.92 | 3.79 |
| 290 | NM_008323.1    | <i>Idh3g</i>         | -1.92 | 3.78 |
| 291 | NM_009183.2    | <i>St8sia4</i>       | -1.92 | 3.78 |
| 292 | NM_001130412.1 | <i>Lpin1</i>         | -1.91 | 3.77 |
| 293 | NM_001033311.3 | <i>Vsig10</i>        | -1.91 | 3.76 |
| 294 | NM_133345.2    | <i>Ing4</i>          | -1.91 | 3.75 |
| 295 | NM_010313.1    | <i>Gnb5</i>          | -1.91 | 3.75 |
| 296 | NM_172443.3    | <i>Tbc1d16</i>       | -1.91 | 3.75 |
| 297 | NM_029467.3    | <i>Tcam1</i>         | -1.9  | 3.74 |
| 298 | NM_011861.2    | <i>Pacsin1</i>       | -1.9  | 3.74 |
| 299 | NM_007435.1    | <i>Abcd1</i>         | -1.9  | 3.73 |
| 300 | NM_009734.3    | <i>Azil</i>          | -1.9  | 3.73 |
| 301 | NM_007956.4    | <i>Esr1</i>          | -1.89 | 3.71 |
| 302 | NM_144915.3    | <i>Daglb</i>         | -1.89 | 3.71 |
| 303 | NM_008921.2    | <i>Prim1</i>         | -1.89 | 3.71 |
| 304 | NM_011416.2    | <i>Smarca2</i>       | -1.89 | 3.71 |
| 305 | NM_022654.1    | <i>Lrdd</i>          | -1.89 | 3.71 |
| 306 | NM_021790.1    | <i>Cenpk</i>         | -1.89 | 3.7  |
| 307 | NM_025495.3    | <i>Cenpp</i>         | -1.89 | 3.69 |
| 308 | NM_025377.3    | <i>Fam33a</i>        | -1.88 | 3.69 |
| 309 | NM_001012517.4 | <i>Fut10</i>         | -1.88 | 3.67 |
| 310 | NM_172903.4    | <i>Man2a2</i>        | -1.88 | 3.67 |
| 311 | NM_001163488.1 | <i>Pfkm</i>          | -1.88 | 3.67 |
| 312 | NM_008521.1    | <i>Ltc4s</i>         | -1.87 | 3.67 |
| 313 | NM_025512.2    | <i>Zfand1</i>        | -1.87 | 3.66 |
| 314 | NM_008845.4    | <i>Pip4k2a</i>       | -1.87 | 3.66 |
| 315 | NM_178694.3    | <i>Zer1</i>          | -1.87 | 3.66 |
| 316 | NM_011133.2    | <i>Pole2</i>         | -1.87 | 3.66 |
| 317 | NM_001199433.1 | <i>Dnmt1</i>         | -1.87 | 3.66 |
| 318 | NM_031392.2    | <i>Wdr6</i>          | -1.87 | 3.65 |
| 319 | NM_028603.4    | <i>Zbtb8a</i>        | -1.87 | 3.65 |

|     |                |                      |       |      |
|-----|----------------|----------------------|-------|------|
| 320 | NM_029249.2    | <i>4930547N16Rik</i> | -1.87 | 3.65 |
| 321 | NM_027560.1    | <i>Arrdc2</i>        | -1.87 | 3.65 |
| 322 | NM_028651.2    | <i>Tmtc4</i>         | -1.87 | 3.65 |
| 323 | NM_133249.2    | <i>Ppargc1b</i>      | -1.87 | 3.65 |
| 324 | NM_145142.2    | <i>Chst10</i>        | -1.86 | 3.64 |
| 325 | NM_001081237.1 | <i>Klhdc5</i>        | -1.86 | 3.63 |
| 326 | NM_001039000.4 | <i>Kif5a</i>         | -1.86 | 3.63 |
| 327 | NM_145924.2    | <i>Cenpi</i>         | -1.86 | 3.63 |
| 328 | NM_030717.1    | <i>Lactb</i>         | -1.86 | 3.62 |
| 329 | NM_133765.4    | <i>Fbxo31</i>        | -1.86 | 3.62 |
| 330 | NM_026418.2    | <i>Rgs10</i>         | -1.86 | 3.62 |
| 331 | NM_145475.4    | <i>Cerk</i>          | -1.85 | 3.61 |
| 332 | NM_001010833.2 | <i>Mdc1</i>          | -1.85 | 3.61 |
| 333 | NM_178061.5    | <i>Mob3b</i>         | -1.85 | 3.6  |
| 334 | NM_177327.3    | <i>Wwp1</i>          | -1.85 | 3.6  |
| 335 | NM_001081076.2 | <i>Gucy2g</i>        | -1.85 | 3.59 |
| 336 | NM_022882.4    | <i>Lpin2</i>         | -1.84 | 3.59 |
| 337 | NM_001142647.1 | <i>Tmem194b</i>      | -1.84 | 3.58 |
| 338 | NR_030718.1    | <i>F630028O10Rik</i> | -1.84 | 3.58 |
| 339 | NM_001081433.3 | <i>Ankrd44</i>       | -1.84 | 3.58 |
| 340 | NM_020022.2    | <i>Rfc2</i>          | -1.84 | 3.58 |
| 341 | NM_010455.2    | <i>Hoxa7</i>         | -1.84 | 3.58 |
| 342 | NM_133719.2    | <i>Metrn</i>         | -1.84 | 3.58 |
| 343 | NM_145508.2    | <i>Dyrk3</i>         | -1.84 | 3.58 |
| 344 | NM_030251.3    | <i>Abtb1</i>         | -1.84 | 3.57 |
| 345 | NM_011496.1    | <i>Aurkb</i>         | -1.84 | 3.57 |
| 346 | NM_001080926.1 | <i>Lrp8</i>          | -1.83 | 3.56 |
| 347 | NM_153781.1    | <i>Pygb</i>          | -1.83 | 3.56 |
| 348 | NM_011158.3    | <i>Prkar2b</i>       | -1.83 | 3.56 |
| 349 | NM_001081406.1 | <i>Lrr1</i>          | -1.83 | 3.55 |
| 350 | NM_145946.2    | <i>Fanci</i>         | -1.83 | 3.55 |
| 351 | NM_001039139.1 | <i>Camk2g</i>        | -1.83 | 3.55 |
| 352 | NM_172468.2    | <i>Snx30</i>         | -1.83 | 3.55 |
| 353 | NM_001164369.1 | <i>Bcas1</i>         | -1.82 | 3.54 |
| 354 | NM_026708.1    | <i>Tlcd1</i>         | -1.82 | 3.54 |
| 355 | NM_010478.2    | <i>Hspa1b</i>        | -1.82 | 3.54 |
| 356 | NM_001081069.1 | <i>Rgs11</i>         | -1.82 | 3.54 |

|     |                |                      |       |      |
|-----|----------------|----------------------|-------|------|
| 357 | NM_024184.2    | <i>Asf1b</i>         | -1.82 | 3.54 |
| 358 | NM_001145884.1 | <i>Itgb5</i>         | -1.82 | 3.53 |
| 359 | NM_175380.5    | <i>Gpd1l</i>         | -1.82 | 3.53 |
| 360 | NM_175445.4    | <i>Rassf2</i>        | -1.82 | 3.53 |
| 361 | NM_026086.2    | <i>Nanp</i>          | -1.82 | 3.53 |
| 362 | NM_001002267.2 | <i>Tmem158</i>       | -1.82 | 3.52 |
| 363 | NM_001163518.1 | <i>2410075B13Rik</i> | -1.81 | 3.52 |
| 364 | NM_018739.2    | <i>Rp9</i>           | -1.81 | 3.51 |
| 365 | NM_008568.2    | <i>Mcm7</i>          | -1.81 | 3.51 |
| 366 | NM_001004362.2 | <i>2610008E11Rik</i> | -1.81 | 3.51 |
| 367 | NM_029850.3    | <i>Bcl7a</i>         | -1.81 | 3.5  |
| 368 | NM_026281.2    | <i>Tm7sf3</i>        | -1.81 | 3.5  |
| 369 | NM_001159559.1 | <i>Xrcc6bp1</i>      | -1.8  | 3.49 |
| 370 | NM_027995.2    | <i>Paqr7</i>         | -1.8  | 3.49 |
| 371 | NM_030246.2    | <i>Dcaf4</i>         | -1.8  | 3.49 |
| 372 | NM_001004164.2 | <i>Gnptab</i>        | -1.8  | 3.49 |
| 373 | NM_001177804.1 | <i>Sirt3</i>         | -1.8  | 3.48 |
| 374 | NM_010615.1    | <i>Kif11</i>         | -1.8  | 3.48 |
| 375 | NM_183091.3    | <i>Tonsl</i>         | -1.8  | 3.48 |
| 376 | NM_019551.2    | <i>Tdp2</i>          | -1.8  | 3.48 |
| 377 | NM_145998.3    | <i>Hmx2</i>          | -1.79 | 3.47 |
| 378 | NM_010790.2    | <i>Melk</i>          | -1.79 | 3.46 |
| 379 | NM_022419.3    | <i>Abhd8</i>         | -1.79 | 3.45 |
| 380 | NM_019488.4    | <i>Slc2a8</i>        | -1.79 | 3.45 |
| 381 | NM_025979.4    | <i>Mastl</i>         | -1.79 | 3.45 |
| 382 | NM_027667.3    | <i>Arhgap19</i>      | -1.79 | 3.45 |
| 383 | NM_170755.2    | <i>Fam134a</i>       | -1.79 | 3.45 |
| 384 | NM_134054.2    | <i>1110002B05Rik</i> | -1.79 | 3.45 |
| 385 | NM_001025311.1 | <i>St6galnac6</i>    | -1.78 | 3.45 |
| 386 | NM_013692.2    | <i>Klf10</i>         | -1.78 | 3.44 |
| 387 | NM_001081266.1 | <i>Ccdc142</i>       | -1.78 | 3.44 |
| 388 | NM_019482.2    | <i>Panx1</i>         | -1.78 | 3.44 |
| 389 | NM_001146081.1 | <i>Fancb</i>         | -1.78 | 3.43 |
| 390 | NM_145392.2    | <i>Bag2</i>          | -1.78 | 3.43 |
| 391 | NM_178113.3    | <i>Ncapd3</i>        | -1.78 | 3.43 |
| 392 | NR_028479.1    | <i>Snora20</i>       | -1.78 | 3.43 |
| 393 | NM_001082974.2 | <i>Neurl2</i>        | -1.78 | 3.42 |

|     |                |                 |       |      |
|-----|----------------|-----------------|-------|------|
| 394 | NM_145853.2    | <i>Tpcn1</i>    | -1.77 | 3.41 |
| 395 | NM_001043322.1 | <i>Fmn1</i>     | -1.77 | 3.41 |
| 396 | NM_001177867.1 | <i>Sgol2</i>    | -1.77 | 3.41 |
| 397 | NM_026376.3    | <i>Plxnd1</i>   | -1.77 | 3.41 |
| 398 | NM_026975.2    | <i>Bola1</i>    | -1.77 | 3.41 |
| 399 | NM_134081.5    | <i>Dnajc9</i>   | -1.77 | 3.41 |
| 400 | NM_025666.2    | <i>Ubr7</i>     | -1.77 | 3.41 |
| 401 | NM_172513.3    | <i>Fam126b</i>  | -1.77 | 3.41 |
| 402 | NM_011340.3    | <i>Serpinf1</i> | -1.77 | 3.4  |
| 403 | NM_011284.3    | <i>Rpa2</i>     | -1.77 | 3.4  |
| 404 | NM_008057.3    | <i>Fzd7</i>     | -1.77 | 3.4  |
| 405 | NM_027480.3    | <i>Ankrd24</i>  | -1.76 | 3.4  |
| 406 | NM_001025371.2 | <i>Serinc4</i>  | -1.76 | 3.39 |
| 407 | NM_139303.1    | <i>Kif18a</i>   | -1.76 | 3.39 |
| 408 | NM_011945.2    | <i>Map3k1</i>   | -1.76 | 3.39 |
| 409 | NM_019972.2    | <i>Sort1</i>    | -1.76 | 3.39 |
| 410 | NM_011132.2    | <i>Pole</i>     | -1.76 | 3.39 |
| 411 | NM_008679.3    | <i>Ncoa3</i>    | -1.76 | 3.39 |
| 412 | NM_027187.3    | <i>Rnaseh2a</i> | -1.76 | 3.38 |
| 413 | NM_027435.2    | <i>Atad2</i>    | -1.76 | 3.38 |
| 414 | NM_009643.1    | <i>Ahnak</i>    | -1.76 | 3.38 |
| 415 | NM_001077695.1 | <i>Ncoa2</i>    | -1.76 | 3.38 |
| 416 | NM_019484.4    | <i>Alyref2</i>  | -1.76 | 3.38 |
| 417 | NM_010353.2    | <i>Gsg2</i>     | -1.76 | 3.38 |
| 418 | NM_001164355.1 | <i>Skal</i>     | -1.76 | 3.38 |
| 419 | NM_013538.5    | <i>Cdca3</i>    | -1.76 | 3.38 |
| 420 | NM_001164205.1 | <i>Tsen34</i>   | -1.75 | 3.37 |
| 421 | NM_001039507.1 | <i>Lipe</i>     | -1.75 | 3.37 |
| 422 | NM_001037736.1 | <i>Arhgef10</i> | -1.75 | 3.37 |
| 423 | NM_009516.3    | <i>Wee1</i>     | -1.75 | 3.37 |
| 424 | NM_001081066.1 | <i>Dennd3</i>   | -1.75 | 3.37 |
| 425 | NM_027986.3    | <i>Cdadcl1</i>  | -1.75 | 3.36 |
| 426 | NM_001146689.1 | <i>Ezh2</i>     | -1.75 | 3.36 |
| 427 | NM_001037725.2 | <i>Fam117b</i>  | -1.75 | 3.36 |
| 428 | NM_013907.2    | <i>Fbxw4</i>    | -1.75 | 3.35 |
| 429 | NM_178309.2    | <i>Brip1</i>    | -1.74 | 3.35 |
| 430 | NM_001128171.1 | <i>Cyld</i>     | -1.74 | 3.34 |

|     |                |                      |       |      |
|-----|----------------|----------------------|-------|------|
| 431 | NM_148958.2    | <i>Osbp110</i>       | -1.74 | 3.34 |
| 432 | NM_023480.2    | <i>Fahd1</i>         | -1.74 | 3.34 |
| 433 | NR_027845.1    | <i>Pex11b</i>        | -1.74 | 3.33 |
| 434 | NM_001134494.1 | <i>Fam55c</i>        | -1.74 | 3.33 |
| 435 | NM_181395.2    | <i>Pxdn</i>          | -1.73 | 3.33 |
| 436 | NM_001012401.2 | <i>Hspb6</i>         | -1.73 | 3.32 |
| 437 | NM_080793.5    | <i>Setd7</i>         | -1.73 | 3.32 |
| 438 | NM_173396.2    | <i>Tgif2</i>         | -1.73 | 3.31 |
| 439 | NM_001162855.1 | <i>Nsmce4a</i>       | -1.73 | 3.31 |
| 440 | NM_028815.4    | <i>Cep97</i>         | -1.73 | 3.31 |
| 441 | NM_016777.3    | <i>Nasp</i>          | -1.73 | 3.31 |
| 442 | NM_015733.4    | <i>Casp9</i>         | -1.73 | 3.31 |
| 443 | NM_021398.3    | <i>Slc43a3</i>       | -1.72 | 3.3  |
| 444 | NM_001081099.1 | <i>2610002D18Rik</i> | -1.72 | 3.3  |
| 445 | NM_172434.2    | <i>Celf3</i>         | -1.72 | 3.3  |
| 446 | NM_001110265.1 | <i>Ttk</i>           | -1.72 | 3.3  |
| 447 | NM_144852.3    | <i>Slc7a4</i>        | -1.72 | 3.3  |
| 448 | NM_145220.2    | <i>Appl2</i>         | -1.72 | 3.3  |
| 449 | NM_001039534.1 | <i>Pstk</i>          | -1.72 | 3.3  |
| 450 | NM_001199310.1 | <i>Lig1</i>          | -1.72 | 3.3  |
| 451 | NM_026260.2    | <i>Tctn3</i>         | -1.72 | 3.3  |
| 452 | NM_133971.2    | <i>Ankrd10</i>       | -1.72 | 3.3  |
| 453 | NM_019972.2    | <i>Sort1</i>         | -1.72 | 3.29 |
| 454 | NM_029096.3    | <i>1110008J03Rik</i> | -1.72 | 3.29 |
| 455 | NM_025866.3    | <i>Cdca7</i>         | -1.72 | 3.29 |
| 456 | NM_001163608.1 | <i>Plxdc1</i>        | -1.72 | 3.28 |
| 457 | NM_001025365.2 | <i>Miip</i>          | -1.72 | 3.28 |
| 458 | NM_053273.2    | <i>Ttyh2</i>         | -1.71 | 3.28 |
| 459 | NM_001159646.1 | <i>Dut</i>           | -1.71 | 3.28 |
| 460 | NM_025676.3    | <i>Mcm8</i>          | -1.71 | 3.28 |
| 461 | NM_001122958.1 | <i>Rad54l</i>        | -1.71 | 3.28 |
| 462 | NM_001039390.2 | <i>Pkig</i>          | -1.71 | 3.28 |
| 463 | NM_177583.4    | <i>Aph1b</i>         | -1.71 | 3.27 |
| 464 | NM_009445.2    | <i>Ttk</i>           | -1.71 | 3.27 |
| 465 | NM_145076.3    | <i>Trim24</i>        | -1.71 | 3.26 |
| 466 | NM_177167.4    | <i>Ppm1e</i>         | -1.71 | 3.26 |
| 467 | NM_153820.3    | <i>Arhgap15</i>      | -1.71 | 3.26 |

|     |                |                      |       |      |
|-----|----------------|----------------------|-------|------|
| 468 | NM_001177985.1 | <i>Zmym3</i>         | -1.71 | 3.26 |
| 469 | NM_001114085.1 | <i>Nde1</i>          | -1.7  | 3.26 |
| 470 | NM_058214.3    | <i>Recql4</i>        | -1.7  | 3.26 |
| 471 | NM_028131.3    | <i>Cenpn</i>         | -1.7  | 3.26 |
| 472 | NM_144547.2    | <i>Amhr2</i>         | -1.7  | 3.26 |
| 473 | NM_028056.1    | <i>1600002H07Rik</i> | -1.7  | 3.25 |
| 474 | NM_029249.2    | <i>4930547N16Rik</i> | -1.7  | 3.25 |
| 475 | NM_010892.3    | <i>Nek2</i>          | -1.7  | 3.25 |
| 476 | NM_012027.2    | <i>Mprlp</i>         | -1.7  | 3.25 |
| 477 | NM_024248.1    | <i>Cars2</i>         | -1.7  | 3.24 |
| 478 | NM_009151.3    | <i>Selplg</i>        | -1.7  | 3.24 |
| 479 | NM_031397.2    | <i>Biccl</i>         | -1.7  | 3.24 |
| 480 | NM_001163359.1 | <i>Figl1</i>         | -1.7  | 3.24 |
| 481 | NM_013872.3    | <i>Pmm1</i>          | -1.69 | 3.24 |
| 482 | NM_173437.2    | <i>Nav1</i>          | -1.69 | 3.23 |
| 483 | NM_145409.2    | <i>Chtf18</i>        | -1.69 | 3.22 |
| 484 | NM_001033244.3 | <i>Fancd2</i>        | -1.69 | 3.22 |
| 485 | NM_007610.1    | <i>Casp2</i>         | -1.68 | 3.21 |
| 486 | NM_172578.2    | <i>Mis18bp1</i>      | -1.68 | 3.21 |
| 487 | NM_198423.3    | <i>Bahcc1</i>        | -1.68 | 3.21 |
| 488 | NM_027269.3    | <i>1110034A24Rik</i> | -1.68 | 3.21 |
| 489 | NM_001115130.1 | <i>Zbtb44</i>        | -1.68 | 3.2  |
| 490 | NM_008535.2    | <i>Lyl1</i>          | -1.68 | 3.2  |
| 491 | NM_011932.2    | <i>Dappl</i>         | -1.68 | 3.2  |
| 492 | NM_133926.2    | <i>Camk1</i>         | -1.68 | 3.2  |
| 493 | NR_028081.1    | <i>1700040I03Rik</i> | -1.68 | 3.2  |
| 494 | NM_134471.4    | <i>Kif2c</i>         | -1.68 | 3.19 |
| 495 | NM_001081170.1 | <i>Pacs2</i>         | -1.67 | 3.19 |
| 496 | NM_021534.3    | <i>Pxmp4</i>         | -1.67 | 3.19 |
| 497 | NM_001081373.2 | <i>Cep164</i>        | -1.67 | 3.18 |
| 498 | NM_011206.2    | <i>Ptpn18</i>        | -1.67 | 3.18 |
| 499 | NM_030750.3    | <i>Sgpp1</i>         | -1.67 | 3.18 |
| 500 | NM_145588.1    | <i>Kif22</i>         | -1.67 | 3.18 |
| 501 | NM_011497.3    | <i>Aurka</i>         | -1.67 | 3.18 |
| 502 | NM_022980.4    | <i>Rcan3</i>         | -1.67 | 3.18 |
| 503 | NM_001114328.1 | <i>Ccpg1</i>         | -1.67 | 3.17 |
| 504 | NM_001130163.1 | <i>Oxr1</i>          | -1.66 | 3.17 |

|     |                |                      |       |      |
|-----|----------------|----------------------|-------|------|
| 505 | NM_027271.1    | <i>D3Ertd751e</i>    | -1.66 | 3.17 |
| 506 | NM_001040695.1 | <i>Uevld</i>         | -1.66 | 3.16 |
| 507 | NM_018747.4    | <i>Akap7</i>         | -1.66 | 3.16 |
| 508 | NM_030026.2    | <i>Mccc2</i>         | -1.66 | 3.16 |
| 509 | NM_175027.4    | <i>Fancb</i>         | -1.66 | 3.16 |
| 510 | NM_010286.3    | <i>Tsc22d3</i>       | -1.66 | 3.15 |
| 511 | NM_027495.4    | <i>Tmem144</i>       | -1.65 | 3.15 |
| 512 | NM_146171.1    | <i>Ncapd2</i>        | -1.65 | 3.15 |
| 513 | NM_001113364.1 | <i>Tbc1d14</i>       | -1.65 | 3.15 |
| 514 | NM_026282.5    | <i>Spc24</i>         | -1.65 | 3.14 |
| 515 | NM_001081117.2 | <i>Mki67</i>         | -1.65 | 3.13 |
| 516 | NM_025560.2    | <i>1810049H13Rik</i> | -1.65 | 3.13 |
| 517 | NM_001206684.1 | <i>2610528A11Rik</i> | -1.64 | 3.13 |
| 518 | NM_001042653.1 | <i>Oip5</i>          | -1.64 | 3.12 |
| 519 | NM_007678.3    | <i>Cebpa</i>         | -1.64 | 3.12 |
| 520 | NM_025508.4    | <i>Gmpr</i>          | -1.64 | 3.11 |
| 521 | NM_199197.1    | <i>Rbfa</i>          | -1.64 | 3.11 |
| 522 | NM_026431.2    | <i>1810043G02Rik</i> | -1.64 | 3.11 |
| 523 | NM_013733.3    | <i>Chaf1a</i>        | -1.64 | 3.11 |
| 524 | NM_009547.2    | <i>Zfp161</i>        | -1.64 | 3.11 |
| 525 | NM_178683.4    | <i>Depdc1b</i>       | -1.64 | 3.11 |
| 526 | NM_001109045.1 | <i>Aqp8</i>          | -1.63 | 3.1  |
| 527 | NM_029835.1    | <i>5730590G19Rik</i> | -1.63 | 3.1  |
| 528 | NM_175275.3    | <i>Cntln</i>         | -1.63 | 3.1  |
| 529 | NM_177026.1    | <i>Tmcc3</i>         | -1.63 | 3.1  |
| 530 | NM_001145898.1 | <i>BC052040</i>      | -1.63 | 3.1  |
| 531 | NM_026024.2    | <i>Ube2t</i>         | -1.63 | 3.1  |
| 532 | NM_001142938.1 | <i>AK010878</i>      | -1.63 | 3.09 |
| 533 | NM_011234.4    | <i>Rad51</i>         | -1.63 | 3.09 |
| 534 | NM_011605.2    | <i>Tmpo</i>          | -1.63 | 3.09 |
| 535 | NM_133765.4    | <i>Fbxo31</i>        | -1.63 | 3.09 |
| 536 | NM_021428.4    | <i>Dexi</i>          | -1.62 | 3.08 |
| 537 | NM_175152.4    | <i>Thap3</i>         | -1.62 | 3.08 |
| 538 | NM_008841.2    | <i>Pik3r2</i>        | -1.62 | 3.07 |
| 539 | NM_174987.4    | <i>1810063B05Rik</i> | -1.62 | 3.07 |
| 540 | NM_001167967.1 | <i>Ankrd10</i>       | -1.62 | 3.07 |
| 541 | NM_001162415.1 | <i>Pfkfb2</i>        | -1.62 | 3.07 |

|     |                |                      |       |      |
|-----|----------------|----------------------|-------|------|
| 542 | NM_033146.1    | <i>Fam158a</i>       | -1.62 | 3.07 |
| 543 | NM_183046.1    | <i>Kif20b</i>        | -1.62 | 3.07 |
| 544 | NM_144818.3    | <i>Ncaph</i>         | -1.61 | 3.06 |
| 545 | NM_027258.1    | <i>Rnf157</i>        | -1.61 | 3.06 |
| 546 | NM_017376.3    | <i>Tef</i>           | -1.61 | 3.06 |
| 547 | NM_008892.2    | <i>Pola1</i>         | -1.61 | 3.05 |
| 548 | NR_037773.1    | <i>Tmem41a</i>       | -1.61 | 3.05 |
| 549 | NM_008793.2    | <i>Pcsk4</i>         | -1.61 | 3.05 |
| 550 | NM_183220.2    | <i>Accs</i>          | -1.61 | 3.05 |
| 551 | NM_008063.2    | <i>Slc37a4</i>       | -1.61 | 3.05 |
| 552 | NM_009399.3    | <i>Tnfrsf11a</i>     | -1.61 | 3.05 |
| 553 | NM_009352.2    | <i>Terf1</i>         | -1.61 | 3.05 |
| 554 | NM_028128.1    | <i>Rfc5</i>          | -1.6  | 3.04 |
| 555 | NM_001163502.1 | <i>C130039O16Rik</i> | -1.6  | 3.04 |
| 556 | NM_172543.4    | <i>Fam117a</i>       | -1.6  | 3.03 |
| 557 | NM_028119.5    | <i>Ddb2</i>          | -1.6  | 3.03 |
| 558 | NM_001163794.1 | <i>Pdik1l</i>        | -1.6  | 3.03 |
| 559 | NM_001009951.1 | <i>BC088983</i>      | -1.6  | 3.03 |
| 560 | NM_007398.3    | <i>Ada</i>           | -1.6  | 3.03 |
| 561 | NM_001098528.2 | <i>Kcnb2</i>         | -1.6  | 3.02 |
| 562 | NM_010347.3    | <i>Aes</i>           | -1.59 | 3.02 |
| 563 | NM_010150.2    | <i>Nr2f6</i>         | -1.59 | 3.02 |
| 564 | NM_199308.2    | <i>Mast3</i>         | -1.59 | 3.02 |
| 565 | NM_028481.1    | <i>Ccdc18</i>        | -1.59 | 3.02 |
| 566 | NR_002847.2    | <i>Malat1</i>        | -1.59 | 3.01 |
| 567 | NM_020046.3    | <i>Dhodh</i>         | -1.59 | 3.01 |
| 568 | NM_001130526.1 | <i>Lzts2</i>         | -1.59 | 3.01 |
| 569 | NM_013769.2    | <i>Tjp3</i>          | -1.59 | 3.01 |
| 570 | NM_001127382.1 | <i>Rbm47</i>         | -1.59 | 3.01 |
| 571 | NM_025964.3    | <i>Mettl21a</i>      | -1.59 | 3.01 |
| 572 | NM_001014976.2 | <i>Espl1</i>         | -1.59 | 3.01 |
| 573 | NM_001164366.1 | <i>Atp13a2</i>       | -1.59 | 3    |
| 574 | NM_030719.3    | <i>Gatsl2</i>        | -1.59 | 3    |
| 575 | NM_023317.2    | <i>Ndel</i>          | -1.59 | 3    |
| 576 | NM_028101.4    | <i>Jmjd8</i>         | -1.59 | 3    |
| 577 | NM_001081453.1 | <i>Nin</i>           | -1.59 | 3    |
| 578 | NM_025411.4    | <i>1110049F12Rik</i> | -1.58 | 3    |



|     |                |                      |       |      |
|-----|----------------|----------------------|-------|------|
| 579 | NM_009013.3    | <i>Rad51ap1</i>      | -1.58 | 3    |
| 580 | NM_028006.2    | <i>Tube1</i>         | -1.58 | 2.99 |
| 581 | NM_030708.2    | <i>Zfx4</i>          | -1.58 | 2.99 |
| 582 | NM_001146073.1 | <i>Hexdc</i>         | -1.58 | 2.99 |
| 583 | NM_009863.2    | <i>Cdc7</i>          | -1.58 | 2.99 |
| 584 | NM_011131.3    | <i>Pold1</i>         | -1.58 | 2.99 |
| 585 | NM_133835.2    | <i>Ubacl</i>         | -1.58 | 2.99 |
| 586 | NM_080446.2    | <i>Helb</i>          | -1.58 | 2.99 |
| 587 | NM_001145780.1 | <i>Use1</i>          | -1.58 | 2.98 |
| 588 | NM_201367.3    | <i>Gpr176</i>        | -1.58 | 2.98 |
| 589 | NM_025853.3    | <i>Dsn1</i>          | -1.57 | 2.97 |
| 590 | NM_198654.3    | <i>Nsl1</i>          | -1.57 | 2.97 |
| 591 | NM_001146180.1 | <i>Mtss1</i>         | -1.57 | 2.97 |
| 592 | NM_013829.2    | <i>Plcb4</i>         | -1.57 | 2.97 |
| 593 | NM_027715.1    | <i>Otud1</i>         | -1.57 | 2.97 |
| 594 | NM_145573.2    | <i>Mrps35</i>        | -1.57 | 2.97 |
| 595 | NM_001164112.1 | <i>Nfatc1</i>        | -1.57 | 2.97 |
| 596 | NM_019479.3    | <i>Hes6</i>          | -1.57 | 2.96 |
| 597 | NM_146033.3    | <i>Ankmy2</i>        | -1.57 | 2.96 |
| 598 | NM_174876.3    | <i>Impg2</i>         | -1.57 | 2.96 |
| 599 | NM_009644.2    | <i>Ahrr</i>          | -1.57 | 2.96 |
| 600 | NM_001159581.1 | <i>Mutyh</i>         | -1.56 | 2.96 |
| 601 | XR_105811.1    | <i>A230045G11Rik</i> | -1.56 | 2.96 |
| 602 | NM_011919.4    | <i>Ingl</i>          | -1.56 | 2.95 |
| 603 | NM_029988.2    | <i>Pigh</i>          | -1.56 | 2.95 |
| 604 | NM_133215.1    | <i>Mtmr4</i>         | -1.56 | 2.95 |
| 605 | NM_001033175.2 | <i>Cln6</i>          | -1.56 | 2.95 |
| 606 | NM_144804.1    | <i>Depdc7</i>        | -1.56 | 2.95 |
| 607 | NM_001033273.2 | <i>5031439G07Rik</i> | -1.56 | 2.95 |
| 608 | NM_008026.4    | <i>Fli1</i>          | -1.56 | 2.95 |
| 609 | NM_024245.4    | <i>Kif23</i>         | -1.56 | 2.95 |
| 610 | NM_008566.2    | <i>Mcm5</i>          | -1.56 | 2.95 |
| 611 | NM_011249.2    | <i>Rbl1</i>          | -1.56 | 2.94 |
| 612 | NM_001160145.1 | <i>Tmem9</i>         | -1.56 | 2.94 |
| 613 | NM_177466.4    | <i>Rab1lfip5</i>     | -1.55 | 2.93 |
| 614 | NM_011121.3    | <i>Plk1</i>          | -1.55 | 2.93 |
| 615 | NM_001163042.1 | <i>Haus8</i>         | -1.55 | 2.93 |

|     |                |                      |       |      |
|-----|----------------|----------------------|-------|------|
| 616 | NM_007499.2    | <i>Atm</i>           | -1.55 | 2.92 |
| 617 | NM_011397.4    | <i>Slc23a1</i>       | -1.55 | 2.92 |
| 618 | NM_177460.4    | <i>Parp16</i>        | -1.55 | 2.92 |
| 619 | NM_026321.4    | <i>Fam174a</i>       | -1.55 | 2.92 |
| 620 | NM_021506.2    | <i>Sh3rf1</i>        | -1.54 | 2.91 |
| 621 | NM_145928.1    | <i>Tspan14</i>       | -1.54 | 2.91 |
| 622 | NM_001081001.1 | <i>Brca2</i>         | -1.54 | 2.91 |
| 623 | NM_001040686.1 | <i>Zfp692</i>        | -1.54 | 2.9  |
| 624 | NM_016785.2    | <i>Tpmt</i>          | -1.54 | 2.9  |
| 625 | NR_015572.1    | <i>1810014B01Rik</i> | -1.53 | 2.9  |
| 626 | NM_030087.2    | <i>Ndufv3</i>        | -1.53 | 2.89 |
| 627 | NM_178732.3    | <i>Zfp324</i>        | -1.53 | 2.89 |
| 628 | NM_001039556.3 | <i>Rad54b</i>        | -1.53 | 2.89 |
| 629 | NM_001163476.1 | <i>Gins1</i>         | -1.53 | 2.88 |
| 630 | NM_001081117.2 | <i>Mki67</i>         | -1.53 | 2.88 |
| 631 | NM_026129.2    | <i>Erp29</i>         | -1.53 | 2.88 |
| 632 | NM_019990.4    | <i>Stard10</i>       | -1.52 | 2.88 |
| 633 | NM_080850.2    | <i>Pask</i>          | -1.52 | 2.87 |
| 634 | NM_138583.2    | <i>D16H22S680E</i>   | -1.52 | 2.87 |
| 635 | NM_001178013.1 | <i>Sfxn3</i>         | -1.52 | 2.87 |
| 636 | NM_001161737.1 | <i>Siva1</i>         | -1.52 | 2.87 |
| 637 | NM_134042.2    | <i>Aldh6a1</i>       | -1.52 | 2.87 |
| 638 | NM_177171.4    | <i>Heatr5a</i>       | -1.52 | 2.87 |
| 639 | NM_023294.2    | <i>Ndc80</i>         | -1.52 | 2.87 |
| 640 | NM_027009.2    | <i>Rfc3</i>          | -1.52 | 2.86 |
| 641 | NM_001204273.1 | <i>Lsm2</i>          | -1.52 | 2.86 |
| 642 | NM_001012273.1 | <i>Birc5</i>         | -1.52 | 2.86 |
| 643 | NM_009569.3    | <i>Zfpm1</i>         | -1.51 | 2.86 |
| 644 | NM_183321.1    | <i>BC053749</i>      | -1.51 | 2.85 |
| 645 | NM_146256.3    | <i>Hpdl</i>          | -1.51 | 2.85 |
| 646 | NM_053269.3    | <i>Rad51c</i>        | -1.51 | 2.85 |
| 647 | NM_178911.4    | <i>Pld4</i>          | -1.51 | 2.85 |
| 648 | NM_001163422.1 | <i>Tatdn3</i>        | -1.51 | 2.85 |
| 649 | NM_026512.1    | <i>Bphl</i>          | -1.51 | 2.85 |
| 650 | NM_001039959.1 | <i>Ahnak</i>         | -1.51 | 2.85 |
| 651 | NM_198105.2    | <i>Fam120c</i>       | -1.51 | 2.84 |
| 652 | NM_019798.5    | <i>Pde4a</i>         | -1.51 | 2.84 |

|     |                |                      |       |      |
|-----|----------------|----------------------|-------|------|
| 653 | NM_176979.5    | <i>Topbp1</i>        | -1.51 | 2.84 |
| 654 | NM_028875.2    | <i>Xrcc3</i>         | -1.5  | 2.84 |
| 655 | NM_011623.2    | <i>Top2a</i>         | -1.5  | 2.83 |
| 656 | NM_028634.3    | <i>Cby1</i>          | -1.5  | 2.83 |
| 657 | NM_013753.2    | <i>X99384</i>        | -1.5  | 2.83 |
| 658 | NM_019940.2    | <i>Zfp111</i>        | -1.5  | 2.83 |
| 659 | NM_026282.5    | <i>Spc24</i>         | -1.5  | 2.83 |
| 660 | NM_001012273.1 | <i>Birc5</i>         | -1.5  | 2.83 |
| 661 | NM_146067.3    | <i>Cpped1</i>        | -1.5  | 2.83 |
| 662 | NM_177752.4    | <i>Eme1</i>          | -1.5  | 2.82 |
| 663 | NM_009689.2    | <i>Birc5</i>         | -1.49 | 2.82 |
| 664 | NM_001081099.1 | <i>2610002D18Rik</i> | -1.49 | 2.82 |
| 665 | NM_001113470.1 | <i>Ctdsp2</i>        | -1.49 | 2.81 |
| 666 | NM_011906.2    | <i>Tpra1</i>         | -1.49 | 2.81 |
| 667 | NM_007533.5    | <i>Bckdha</i>        | -1.49 | 2.81 |
| 668 | NM_008044.2    | <i>Fxn</i>           | -1.49 | 2.8  |
| 669 | NM_181815.3    | <i>4930534B04Rik</i> | -1.48 | 2.8  |
| 670 | NM_177343.3    | <i>Camk1d</i>        | -1.48 | 2.8  |
| 671 | NM_008637.1    | <i>Nudt1</i>         | -1.48 | 2.8  |
| 672 | NM_001039669.2 | <i>Iffo1</i>         | -1.48 | 2.8  |
| 673 | NM_011734.3    | <i>Siae</i>          | -1.48 | 2.8  |
| 674 | NM_001253809.1 | <i>Racgap1</i>       | -1.48 | 2.79 |
| 675 | NM_026543.3    | <i>3010026O09Rik</i> | -1.48 | 2.79 |
| 676 | NM_025812.2    | <i>Hmg20a</i>        | -1.48 | 2.79 |
| 677 | NM_212473.1    | <i>Fam53b</i>        | -1.48 | 2.79 |
| 678 | NM_175265.4    | <i>6720463M24Rik</i> | -1.48 | 2.79 |
| 679 | NM_010829.2    | <i>Msh3</i>          | -1.48 | 2.79 |
| 680 | NM_001081499.2 | <i>Tbc1d8b</i>       | -1.48 | 2.78 |
| 681 | NM_011871.2    | <i>Prkra</i>         | -1.48 | 2.78 |
| 682 | NM_008565.3    | <i>Mcm4</i>          | -1.47 | 2.77 |
| 683 | NM_001195486.1 | <i>Srsf7</i>         | -1.47 | 2.77 |
| 684 | NM_001039562.1 | <i>Ankrd37</i>       | -1.47 | 2.77 |
| 685 | NM_027855.3    | <i>0610007C21Rik</i> | -1.47 | 2.77 |
| 686 | NM_011894.2    | <i>Sh3bp5</i>        | -1.47 | 2.77 |
| 687 | NM_028536.1    | <i>1700054N08Rik</i> | -1.47 | 2.77 |
| 688 | NM_001081396.2 | <i>Wdr67</i>         | -1.47 | 2.77 |
| 689 | NM_146089.2    | <i>Haus1</i>         | -1.47 | 2.77 |

|     |                |                |       |      |
|-----|----------------|----------------|-------|------|
| 690 | NM_001114085.1 | <i>Nde1</i>    | -1.47 | 2.76 |
| 691 | NM_011919.4    | <i>Ing1</i>    | -1.47 | 2.76 |
| 692 | NM_080456.1    | <i>Mrps6</i>   | -1.46 | 2.76 |
| 693 | NM_133190.1    | <i>Cacng8</i>  | -1.46 | 2.76 |
| 694 | NM_178396.4    | <i>Car12</i>   | -1.46 | 2.75 |
| 695 | NM_199308.2    | <i>Mast3</i>   | -1.46 | 2.75 |
| 696 | NM_001109993.1 | <i>Tmem141</i> | -1.46 | 2.75 |
| 697 | NM_176836.3    | <i>Fam76b</i>  | -1.46 | 2.75 |
| 698 | NM_001136073.1 | <i>Nfatc2</i>  | -1.46 | 2.75 |
| 699 | NM_024240.6    | <i>Gins4</i>   | -1.46 | 2.75 |
| 700 | NM_019800.4    | <i>Acp6</i>    | -1.46 | 2.74 |
| 701 | NM_011020.3    | <i>Hspa4l</i>  | -1.45 | 2.74 |
| 702 | NM_172824.3    | <i>Ccdc14</i>  | -1.45 | 2.73 |
| 703 | NM_153545.2    | <i>Lrrc45</i>  | -1.45 | 2.73 |
| 704 | NM_008787.3    | <i>Pcnt</i>    | -1.45 | 2.73 |
| 705 | NM_020270.2    | <i>Scamp5</i>  | -1.45 | 2.73 |
| 706 | NM_029394.3    | <i>Snx24</i>   | -1.45 | 2.73 |
| 707 | NM_001112711.1 | <i>Grk6</i>    | -1.45 | 2.73 |
| 708 | NM_016769.4    | <i>Smad3</i>   | -1.45 | 2.73 |
| 709 | NM_001081170.1 | <i>Pacs2</i>   | -1.45 | 2.73 |
| 710 | NM_009014.3    | <i>Rad5111</i> | -1.45 | 2.73 |
| 711 | NM_027745.1    | <i>Ccdc57</i>  | -1.45 | 2.72 |

**Table S4. The differentially expressed genes between shDab2-B and shLuc cells (DC/LC)**

| No.                       | GenBank accession no. | Gene Symbol      | Log <sub>2</sub> Ratio | Fold Change |
|---------------------------|-----------------------|------------------|------------------------|-------------|
| <b>Up-regulated genes</b> |                       |                  |                        |             |
| 1                         | NM_022886.2           | <i>Scel</i>      | 2.86                   | 7.24        |
| 2                         | NM_080853.3           | <i>Slc17a6</i>   | 2.81                   | 7.00        |
| 3                         | NM_001081076.2        | <i>Gucy2g</i>    | 2.69                   | 6.45        |
| 4                         | NM_010215.3           | <i>Il4i1</i>     | 2.37                   | 5.16        |
| 5                         | NM_001081180.1        | <i>Spink5</i>    | 2.36                   | 5.15        |
| 6                         | NM_011333.3           | <i>Ccl2</i>      | 2.20                   | 4.59        |
| 7                         | NM_010658.3           | <i>Mafb</i>      | 2.18                   | 4.52        |
| 8                         | NM_020008.2           | <i>Clec7a</i>    | 2.17                   | 4.50        |
| 9                         | NM_023061.2           | <i>Mcam</i>      | 2.14                   | 4.42        |
| 10                        | NM_174876.3           | <i>Impg2</i>     | 2.13                   | 4.37        |
| 11                        | NM_010118.3           | <i>Egr2</i>      | 1.99                   | 3.98        |
| 12                        | NM_001146119.1        | <i>Fam49a</i>    | 1.96                   | 3.89        |
| 13                        | NM_001199105.1        | <i>Trp53inp1</i> | 1.95                   | 3.86        |
| 14                        | NM_013750.2           | <i>Phlda3</i>    | 1.94                   | 3.84        |
| 15                        | NM_021334.2           | <i>Itgax</i>     | 1.94                   | 3.83        |
| 16                        | NM_026439.2           | <i>Ccdc80</i>    | 1.90                   | 3.74        |
| 17                        | NR_030687.1           | <i>Rn7sk</i>     | 1.89                   | 3.72        |
| 18                        | NM_153408.2           | <i>Neurl3</i>    | 1.87                   | 3.66        |
| 19                        | NM_008808.3           | <i>Pdgfa</i>     | 1.87                   | 3.65        |
| 20                        | NM_011607.3           | <i>Tnc</i>       | 1.84                   | 3.59        |
| 21                        | NM_013454.3           | <i>Abca1</i>     | 1.82                   | 3.54        |
| 22                        | NM_009344.3           | <i>Phlda1</i>    | 1.72                   | 3.29        |
| 23                        | NM_019568.2           | <i>Cxcl14</i>    | 1.69                   | 3.22        |
| 24                        | NM_011459.4           | <i>Serpib8</i>   | 1.67                   | 3.19        |
| 25                        | NM_008392.1           | <i>Irg1</i>      | 1.60                   | 3.03        |
| 26                        | NM_176913.3           | <i>Dpep2</i>     | 1.59                   | 3.01        |
| 27                        | NM_001172055.1        | <i>Bdh2</i>      | 1.59                   | 3.00        |
| 28                        | NM_009344.3           | <i>Phlda1</i>    | 1.58                   | 2.98        |
| 29                        | NM_017480.2           | <i>Icos</i>      | 1.57                   | 2.97        |
| 30                        | NM_009192.2           | <i>Sla</i>       | 1.55                   | 2.93        |

|                             |                |                |       |      |
|-----------------------------|----------------|----------------|-------|------|
| 31                          | NM_008139.5    | <i>Gnaq</i>    | 1.52  | 2.87 |
| 32                          | NM_010130.4    | <i>Emr1</i>    | 1.52  | 2.86 |
| 33                          | NM_001190950.1 | <i>Kcne3</i>   | 1.48  | 2.79 |
| 34                          | NM_011338.2    | <i>Ccl9</i>    | 1.47  | 2.78 |
| <b>Down-regulated genes</b> |                |                |       |      |
| 1                           | NM_153543.2    | <i>Aldh1l2</i> | -2.58 | 5.99 |
| 2                           | NM_008132.2    | <i>Glrp1</i>   | -2.47 | 5.55 |
| 3                           | NM_018861.3    | <i>Slc1a4</i>  | -2.43 | 5.41 |
| 4                           | NM_175093.2    | <i>Trib3</i>   | -2.43 | 5.38 |
| 5                           | NM_145953.2    | <i>Cth</i>     | -2.32 | 4.98 |
| 6                           | NM_026929.4    | <i>Chac1</i>   | -2.22 | 4.66 |
| 7                           | NM_001130479.1 | <i>Nucb2</i>   | -1.92 | 3.77 |
| 8                           | NM_027258.1    | <i>Rnf157</i>  | -1.86 | 3.64 |
| 9                           | NM_008483.3    | <i>Lamb2</i>   | -1.71 | 3.26 |
| 10                          | NM_027641.2    | <i>Spef1</i>   | -1.69 | 3.23 |
| 11                          | NM_019765.4    | <i>Clip1</i>   | -1.59 | 3.01 |
| 12                          | NM_008695.2    | <i>Nid2</i>    | -1.56 | 2.96 |
| 13                          | NM_177981.2    | <i>Hap1</i>    | -1.55 | 2.94 |
| 14                          | NM_001159538.1 | <i>Fgd2</i>    | -1.55 | 2.93 |
| 15                          | NM_001130479.1 | <i>Nucb2</i>   | -1.51 | 2.86 |
| 16                          | NM_008810.2    | <i>Pdha1</i>   | -1.51 | 2.86 |
| 17                          | NM_001105561.1 | <i>Gm11545</i> | -1.50 | 2.82 |
| 18                          | NM_008737.2    | <i>Nrp1</i>    | -1.45 | 2.73 |

**Table S5. The differentially expressed genes between LPS-treated shDab2-B and shLuc cells (DL/LL)**

| No.                       | GenBank accession no. | Gene Symbol          | Log <sub>2</sub> Ratio | Fold Change |
|---------------------------|-----------------------|----------------------|------------------------|-------------|
| <b>Up-regulated genes</b> |                       |                      |                        |             |
| 1                         | NR_033554.1           | <i>D330041H03Rik</i> | 6.64                   | 100.00      |
| 2                         | NM_031168.1           | <i>Il6</i>           | 4.61                   | 24.47       |
| 3                         | NM_001174170.1        | <i>Serpib2</i>       | 3.95                   | 15.43       |
| 4                         | NM_010259.2           | <i>Gbp1</i>          | 3.77                   | 13.63       |
| 5                         | NM_008491.1           | <i>Lcn2</i>          | 3.74                   | 13.35       |
| 6                         | NM_010260.1           | <i>Gbp2</i>          | 3.42                   | 10.70       |
| 7                         | NM_001044384.1        | <i>Timp1</i>         | 2.99                   | 7.94        |
| 8                         | NM_020001.2           | <i>Clec4n</i>        | 2.80                   | 6.98        |
| 9                         | NM_008485.3           | <i>Lamc2</i>         | 2.79                   | 6.93        |
| 10                        | NM_203320.2           | <i>Cxcl3</i>         | 2.70                   | 6.51        |
| 11                        | NM_177371.3           | <i>Tnfrsf15</i>      | 2.64                   | 6.25        |
| 12                        | NM_017466.4           | <i>Ccr12</i>         | 2.63                   | 6.19        |
| 13                        | NM_010846.1           | <i>Mx1</i>           | 2.60                   | 6.07        |
| 14                        | NM_001081984.1        | <i>Popdc2</i>        | 2.56                   | 5.92        |
| 15                        | NM_009137.2           | <i>Ccl22</i>         | 2.56                   | 5.92        |
| 16                        | NM_001159558.1        | <i>Cd36</i>          | 2.54                   | 5.81        |
| 17                        | NM_021334.2           | <i>Itgax</i>         | 2.53                   | 5.77        |
| 18                        | NM_011331.2           | <i>Ccl12</i>         | 2.52                   | 5.74        |
| 19                        | NM_001081180.1        | <i>Spink5</i>        | 2.51                   | 5.70        |
| 20                        | NM_001040699.1        | <i>Mtmr7</i>         | 2.49                   | 5.64        |
| 21                        | NM_008329.2           | <i>Ifi204</i>        | 2.47                   | 5.53        |
| 22                        | NM_001142706.1        | <i>Cfb</i>           | 2.41                   | 5.30        |
| 23                        | NM_010554.4           | <i>Il1a</i>          | 2.35                   | 5.11        |
| 24                        | NM_010171.3           | <i>F3</i>            | 2.34                   | 5.07        |
| 25                        | NM_010510.1           | <i>Ifnb1</i>         | 2.33                   | 5.01        |
| 26                        | NM_013454.3           | <i>Abca1</i>         | 2.30                   | 4.93        |
| 27                        | NM_172603.3           | <i>Phf11</i>         | 2.27                   | 4.83        |
| 28                        | NM_010130.4           | <i>Emr1</i>          | 2.27                   | 4.81        |
| 29                        | NM_019450.3           | <i>Il1f6</i>         | 2.26                   | 4.80        |

|    |                |                      |      |      |
|----|----------------|----------------------|------|------|
| 30 | NM_001083312.1 | <i>Gbp7</i>          | 2.26 | 4.79 |
| 31 | NM_001005858.3 | <i>I830012O16Rik</i> | 2.24 | 4.73 |
| 32 | NM_020008.2    | <i>Clec7a</i>        | 2.23 | 4.68 |
| 33 | NM_018734.3    | <i>Gbp3</i>          | 2.22 | 4.67 |
| 34 | NM_001166376.1 | <i>Ms4a6c</i>        | 2.17 | 4.50 |
| 35 | NM_009373.3    | <i>Tgm2</i>          | 2.16 | 4.47 |
| 36 | NM_021274.2    | <i>Cxcl10</i>        | 2.13 | 4.38 |
| 37 | NM_013654.3    | <i>Ccl7</i>          | 2.13 | 4.38 |
| 38 | NM_010104.3    | <i>Edn1</i>          | 2.13 | 4.37 |
| 39 | NM_153510.3    | <i>Pilra</i>         | 2.12 | 4.35 |
| 40 | NM_019448.3    | <i>Dnmt3l</i>        | 2.11 | 4.32 |
| 41 | NM_019568.2    | <i>Cxcl14</i>        | 2.10 | 4.28 |
| 42 | NM_008230.5    | <i>Hdc</i>           | 2.09 | 4.27 |
| 43 | NM_080853.3    | <i>Slc17a6</i>       | 2.08 | 4.21 |
| 44 | NM_028595.4    | <i>Ms4a6c</i>        | 2.04 | 4.13 |
| 45 | NM_009344.3    | <i>Phlda1</i>        | 2.04 | 4.12 |
| 46 | NM_008331.3    | <i>Ifit1</i>         | 2.00 | 4.00 |
| 47 | NM_001037917.2 | <i>Gm6377</i>        | 1.91 | 3.77 |
| 48 | NM_175026.3    | <i>Pyhin1</i>        | 1.87 | 3.66 |
| 49 | NM_001159402.1 | <i>Upp1</i>          | 1.86 | 3.62 |
| 50 | NM_009895.3    | <i>Cish</i>          | 1.84 | 3.57 |
| 51 | NM_011333.3    | <i>Ccl2</i>          | 1.83 | 3.54 |
| 52 | NM_007498.3    | <i>Atf3</i>          | 1.82 | 3.54 |
| 53 | NM_030565.6    | <i>Fam20c</i>        | 1.81 | 3.50 |
| 54 | NM_009969.4    | <i>Csf2</i>          | 1.79 | 3.47 |
| 55 | NM_009627.1    | <i>Adm</i>           | 1.79 | 3.46 |
| 56 | NM_001013761.1 | <i>Gm606</i>         | 1.79 | 3.45 |
| 57 | NM_010329.2    | <i>Pdpr</i>          | 1.78 | 3.44 |
| 58 | NM_001002927.2 | <i>Penk</i>          | 1.78 | 3.43 |
| 59 | NM_009192.2    | <i>Sla</i>           | 1.77 | 3.42 |
| 60 | NM_011607.3    | <i>Tnc</i>           | 1.77 | 3.41 |
| 61 | NM_011610.3    | <i>Tnfrsf1b</i>      | 1.77 | 3.41 |
| 62 | NM_177371.3    | <i>Tnfrsf15</i>      | 1.77 | 3.41 |
| 63 | NM_010442.2    | <i>Hmox1</i>         | 1.75 | 3.37 |
| 64 | NM_176913.3    | <i>Dpep2</i>         | 1.74 | 3.34 |
| 65 | NM_008215.2    | <i>Has1</i>          | 1.74 | 3.33 |



|     |                |                      |      |      |
|-----|----------------|----------------------|------|------|
| 66  | NM_172803.2    | <i>Dock4</i>         | 1.73 | 3.33 |
| 67  | NM_008964.4    | <i>Ptger2</i>        | 1.72 | 3.29 |
| 68  | NM_009856.2    | <i>Cd83</i>          | 1.69 | 3.23 |
| 69  | NM_028096.1    | <i>2010300C02Rik</i> | 1.69 | 3.23 |
| 70  | NM_021394.2    | <i>Zbp1</i>          | 1.67 | 3.18 |
| 71  | NM_008392.1    | <i>Irg1</i>          | 1.66 | 3.15 |
| 72  | NM_145066.4    | <i>Gpr85</i>         | 1.65 | 3.14 |
| 73  | NM_019466.3    | <i>Rcan1</i>         | 1.63 | 3.10 |
| 74  | NM_153564.2    | <i>Gbp5</i>          | 1.63 | 3.09 |
| 75  | NR_027805.1    | <i>A430093F15Rik</i> | 1.62 | 3.07 |
| 76  | NM_009855.2    | <i>Cd80</i>          | 1.61 | 3.05 |
| 77  | NM_026835.2    | <i>Ms4a6d</i>        | 1.61 | 3.05 |
| 78  | NM_013673.3    | <i>Sp100</i>         | 1.60 | 3.03 |
| 79  | NM_011610.3    | <i>Tnfrsf1b</i>      | 1.59 | 3.02 |
| 80  | NM_010821.1    | <i>Mpeg1</i>         | 1.59 | 3.01 |
| 81  | NM_023120.4    | <i>Gnb1l</i>         | 1.58 | 2.98 |
| 82  | NM_001128133.1 | <i>Cd200r3</i>       | 1.57 | 2.96 |
| 83  | NM_010215.3    | <i>Il4il</i>         | 1.56 | 2.94 |
| 84  | NM_010720.3    | <i>Lipg</i>          | 1.55 | 2.94 |
| 85  | NM_009705.3    | <i>Arg2</i>          | 1.55 | 2.93 |
| 86  | NM_025992.2    | <i>Herc6</i>         | 1.55 | 2.93 |
| 87  | XM_003086779.1 | <i>Gm11428</i>       | 1.55 | 2.92 |
| 88  | NM_133914.2    | <i>Rasa4</i>         | 1.54 | 2.92 |
| 89  | NM_008139.5    | <i>Gnaq</i>          | 1.54 | 2.91 |
| 90  | NM_007836.1    | <i>Gadd45a</i>       | 1.54 | 2.90 |
| 91  | NM_001146119.1 | <i>Fam49a</i>        | 1.53 | 2.89 |
| 92  | NM_021384.4    | <i>Rsad2</i>         | 1.52 | 2.87 |
| 93  | NM_001113527.1 | <i>Isg20</i>         | 1.52 | 2.86 |
| 94  | NM_025586.3    | <i>Rpl15</i>         | 1.51 | 2.84 |
| 95  | NM_008538.2    | <i>Marcks</i>        | 1.51 | 2.84 |
| 96  | NM_207231.1    | <i>Arl5c</i>         | 1.49 | 2.82 |
| 97  | NM_020260.2    | <i>Arhgap31</i>      | 1.49 | 2.81 |
| 98  | NM_134102.4    | <i>Pla1a</i>         | 1.48 | 2.78 |
| 99  | NM_001081076.2 | <i>Gucy2g</i>        | 1.47 | 2.77 |
| 100 | NM_011299.4    | <i>Rps6ka2</i>       | 1.47 | 2.76 |
| 101 | NM_025626.4    | <i>Fam107b</i>       | 1.46 | 2.76 |

|                             |                |                      |       |      |
|-----------------------------|----------------|----------------------|-------|------|
| 102                         | NM_008321.2    | <i>Id3</i>           | 1.46  | 2.75 |
| 103                         | NM_013653.3    | <i>Ccl5</i>          | 1.45  | 2.74 |
| 104                         | NM_008332.3    | <i>Ifit2</i>         | 1.45  | 2.74 |
| <b>Down-regulated genes</b> |                |                      |       |      |
| 1                           | NM_001105561.1 | <i>Gm11545</i>       | -2.41 | 5.32 |
| 2                           | XR_140864.1    | <i>5330417H12Rik</i> | -2.30 | 4.92 |
| 3                           | NM_134050.4    | <i>Rab15</i>         | -2.07 | 4.21 |
| 4                           | NM_001164717.1 | <i>Sh3pxd2a</i>      | -1.97 | 3.93 |
| 5                           | NM_177235.3    | <i>Bend6</i>         | -1.95 | 3.88 |
| 6                           | NM_181039.2    | <i>Lphn1</i>         | -1.92 | 3.79 |
| 7                           | NM_029116.2    | <i>Kbtbd11</i>       | -1.84 | 3.59 |
| 8                           | NM_027118.1    | <i>Cdk13</i>         | -1.78 | 3.44 |
| 9                           | NM_178396.4    | <i>Car12</i>         | -1.76 | 3.39 |
| 10                          | NM_177778.4    | <i>Armc7</i>         | -1.74 | 3.33 |
| 11                          | NM_008695.2    | <i>Nid2</i>          | -1.69 | 3.22 |
| 12                          | NM_178856.1    | <i>Gins2</i>         | -1.68 | 3.20 |
| 13                          | NM_016803.3    | <i>Chst3</i>         | -1.65 | 3.13 |
| 14                          | NM_019429.2    | <i>Prss16</i>        | -1.64 | 3.13 |
| 15                          | NM_146094.2    | <i>Fads1</i>         | -1.64 | 3.11 |
| 16                          | NM_007421.2    | <i>Adssl1</i>        | -1.64 | 3.11 |
| 17                          | NM_001159538.1 | <i>Fgd2</i>          | -1.59 | 3.01 |
| 18                          | NM_001033162.2 | <i>1700012A16Rik</i> | -1.59 | 3.00 |
| 19                          | NM_181316.4    | <i>Bbs9</i>          | -1.58 | 3.00 |
| 20                          | NM_008323.1    | <i>Idh3g</i>         | -1.57 | 2.97 |
| 21                          | NM_008810.2    | <i>Pdha1</i>         | -1.56 | 2.96 |
| 22                          | NM_001145821.1 | <i>Ggtal1</i>        | -1.56 | 2.95 |
| 23                          | NM_148958.2    | <i>Osbpl10</i>       | -1.53 | 2.89 |
| 24                          | NM_001080926.1 | <i>Lrp8</i>          | -1.53 | 2.89 |
| 25                          | NM_015733.4    | <i>Casp9</i>         | -1.53 | 2.88 |
| 26                          | NM_177167.4    | <i>Ppm1e</i>         | -1.52 | 2.86 |
| 27                          | NM_001033171.2 | <i>Klrg2</i>         | -1.50 | 2.82 |
| 28                          | NM_011110.4    | <i>Pla2g5</i>        | -1.48 | 2.80 |
| 29                          | NM_145953.2    | <i>Cth</i>           | -1.47 | 2.76 |
| 30                          | NM_001143777.1 | <i>Fam13c</i>        | -1.46 | 2.76 |
| 31                          | NM_001130479.1 | <i>Nucb2</i>         | -1.46 | 2.76 |
| 32                          | NM_025995.2    | <i>Fbxo5</i>         | -1.46 | 2.75 |
